# Supplementary material
Source: PubMed Central journal article supplement (PMC4445140)
Supplement: NIHMS647338-supplement-1.pdf [file NIHMS647338-supplement-1.pdf]

Identification of six new susceptibility loci for invasive epithelial ovarian cancer

**Supplementary Figures**

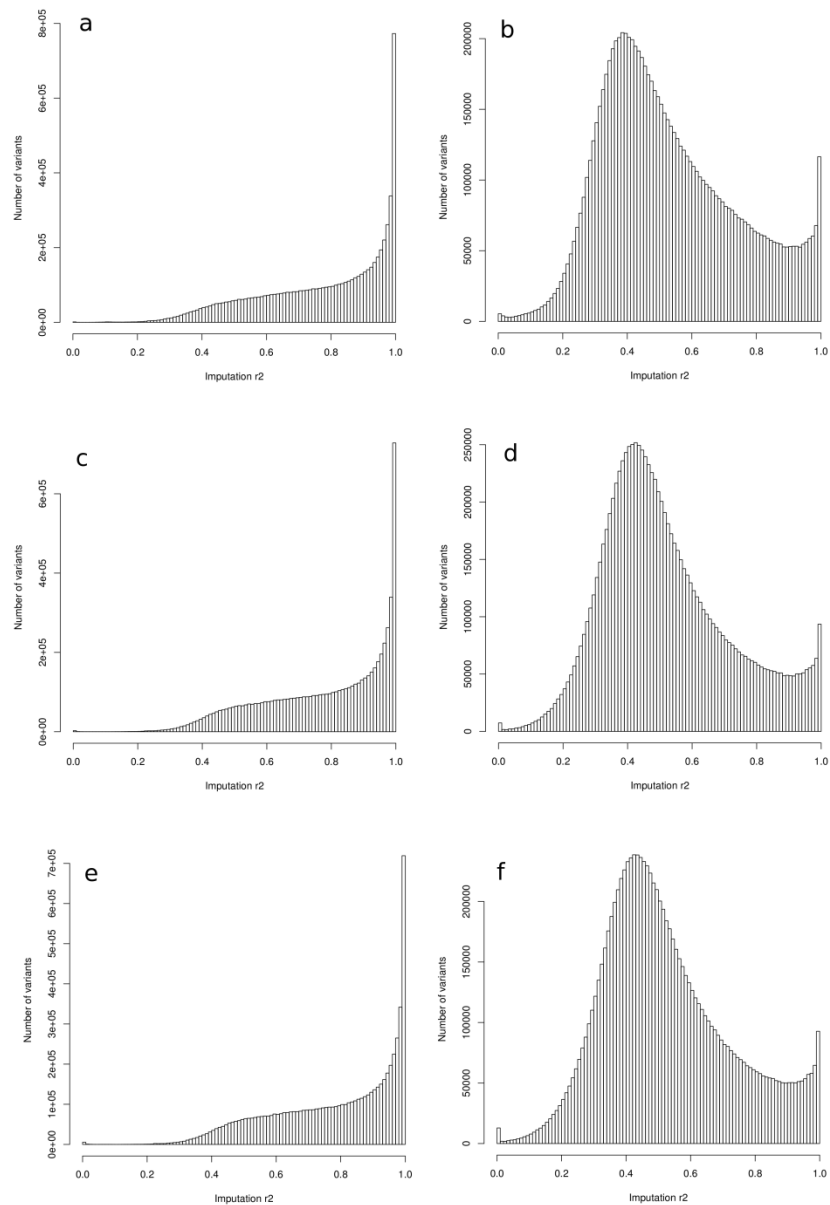

## Supplementary Figure 1

### Imputation accuracy distribution.

Histogram showing the distribution of imputation accuracy estimates  $r^2$  in the first genotype imputation on the 1000 Genomes Project data v3 for SNPs with MAF > 0.05 (a, c, e) and for SNPs with MAF ≤ 0.05 (b,d,f) in OCAC-iCOGS (a, b), *BRCA1* mutation carriers (c, d) and *BRCA2* mutation carriers (e, f).

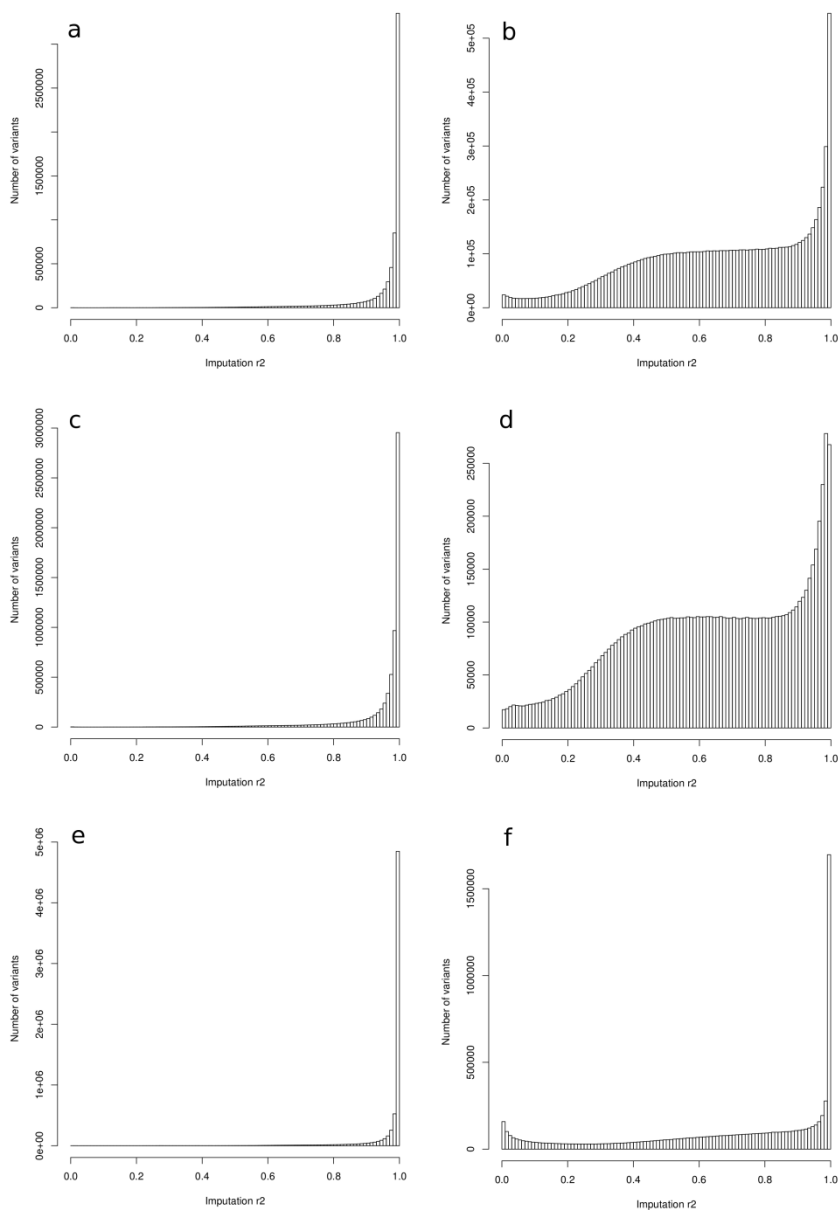

**Supplementary Figure 2**

**Imputation accuracy distribution.**

Histogram showing the distribution of imputation accuracy estimates  $r^2$  in the first genotype imputation on the 1000 Genomes Project data v3 for SNPs with MAF >0.05 (a, c, e) and for SNPs with MAF ≤0.05 (b,d,f) in the UK GWAS (a, b), the US GWAS (c, d) and the U19 GWAS (e, f).

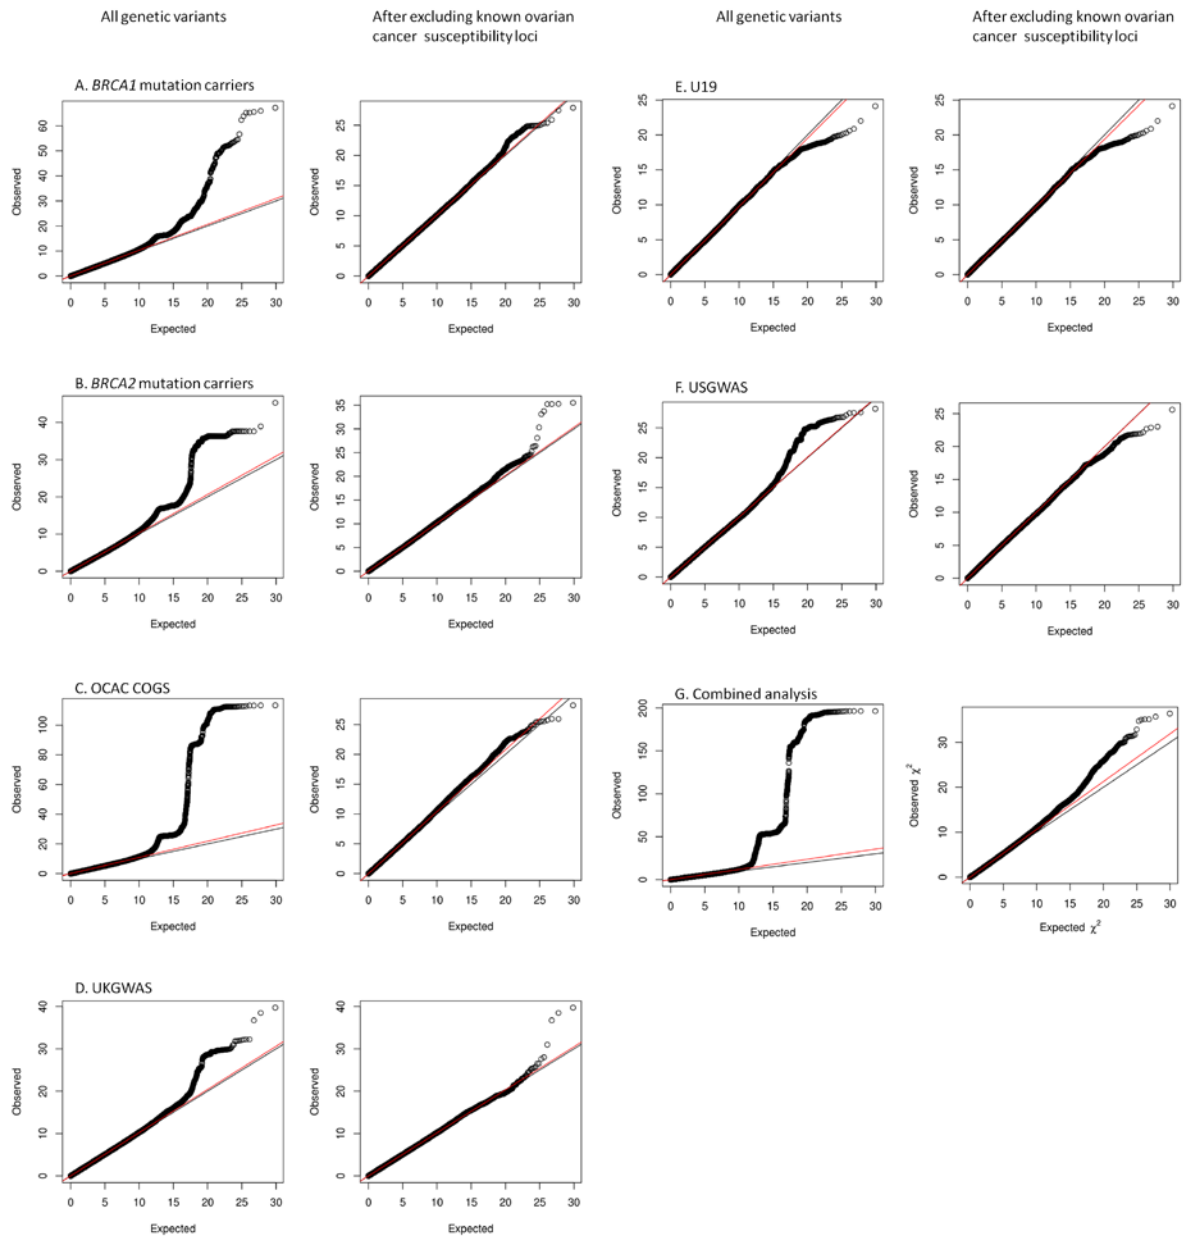

**Supplementary Figure 3**

**Quantile-quantile plot for genetic variants from the genotype imputation.**

The left column on the left shows all variants and the right column shows variants not located in regions previously known to be associated with invasive ovarian cancer.

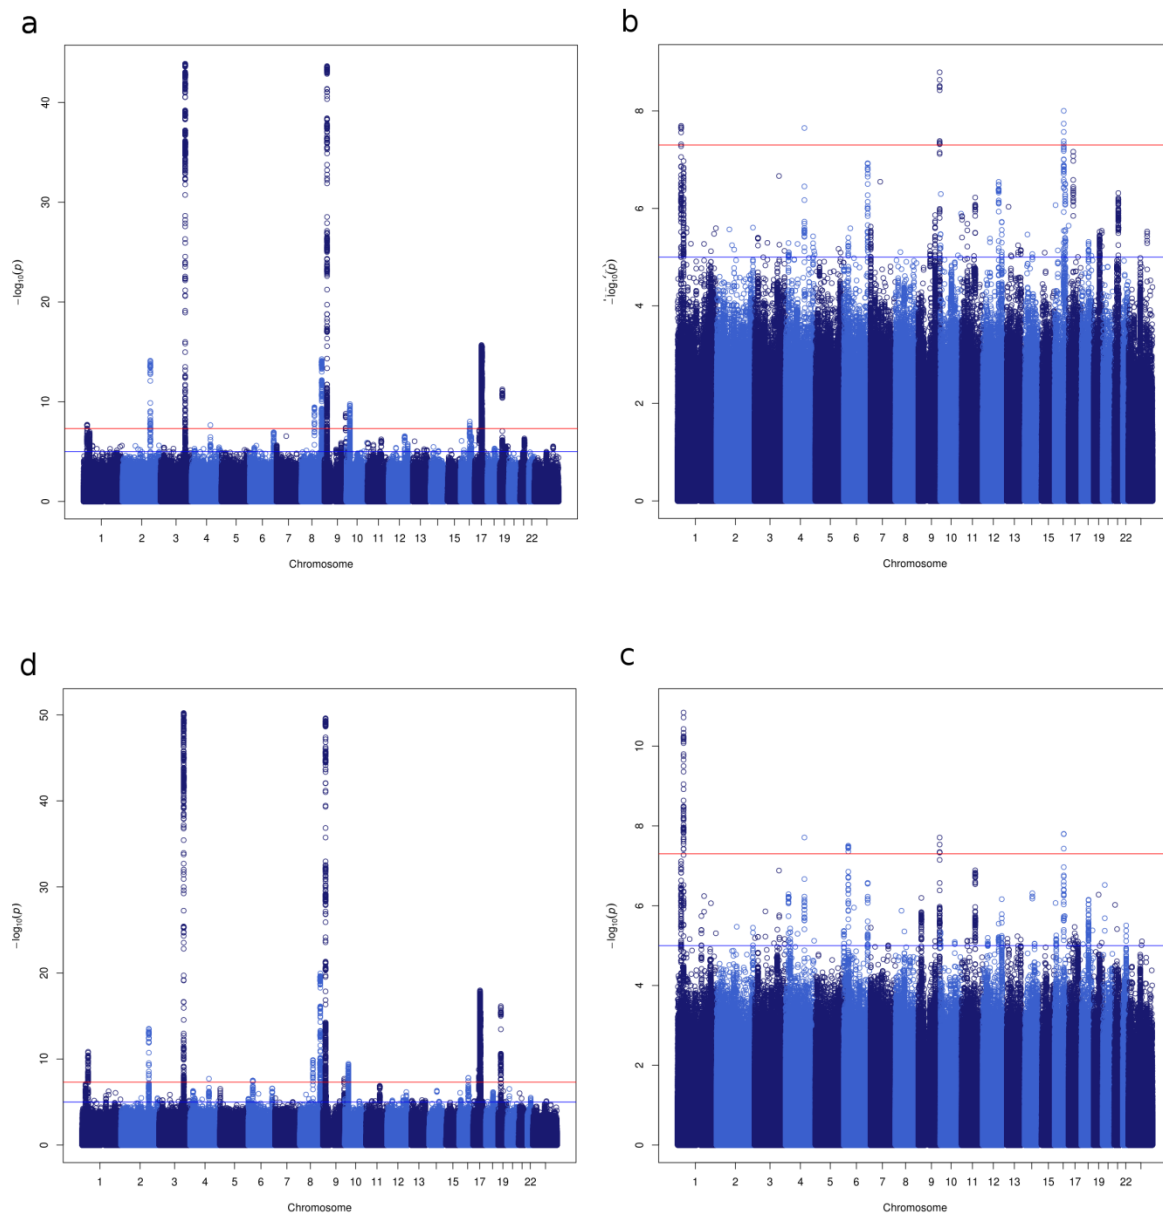

**Supplementary Figure 4**

**Meta-analysis risk associations.**

Manhattan plots showing the meta-analysis associations of genetic variants with risk of all subtypes of ovarian cancer (a, b) and serous subtype ovarian cancer (c, d) for all genetic variants available after the first imputation (a,c) and after excluding SNPs located within known ovarian cancer susceptibility loci (b,d).

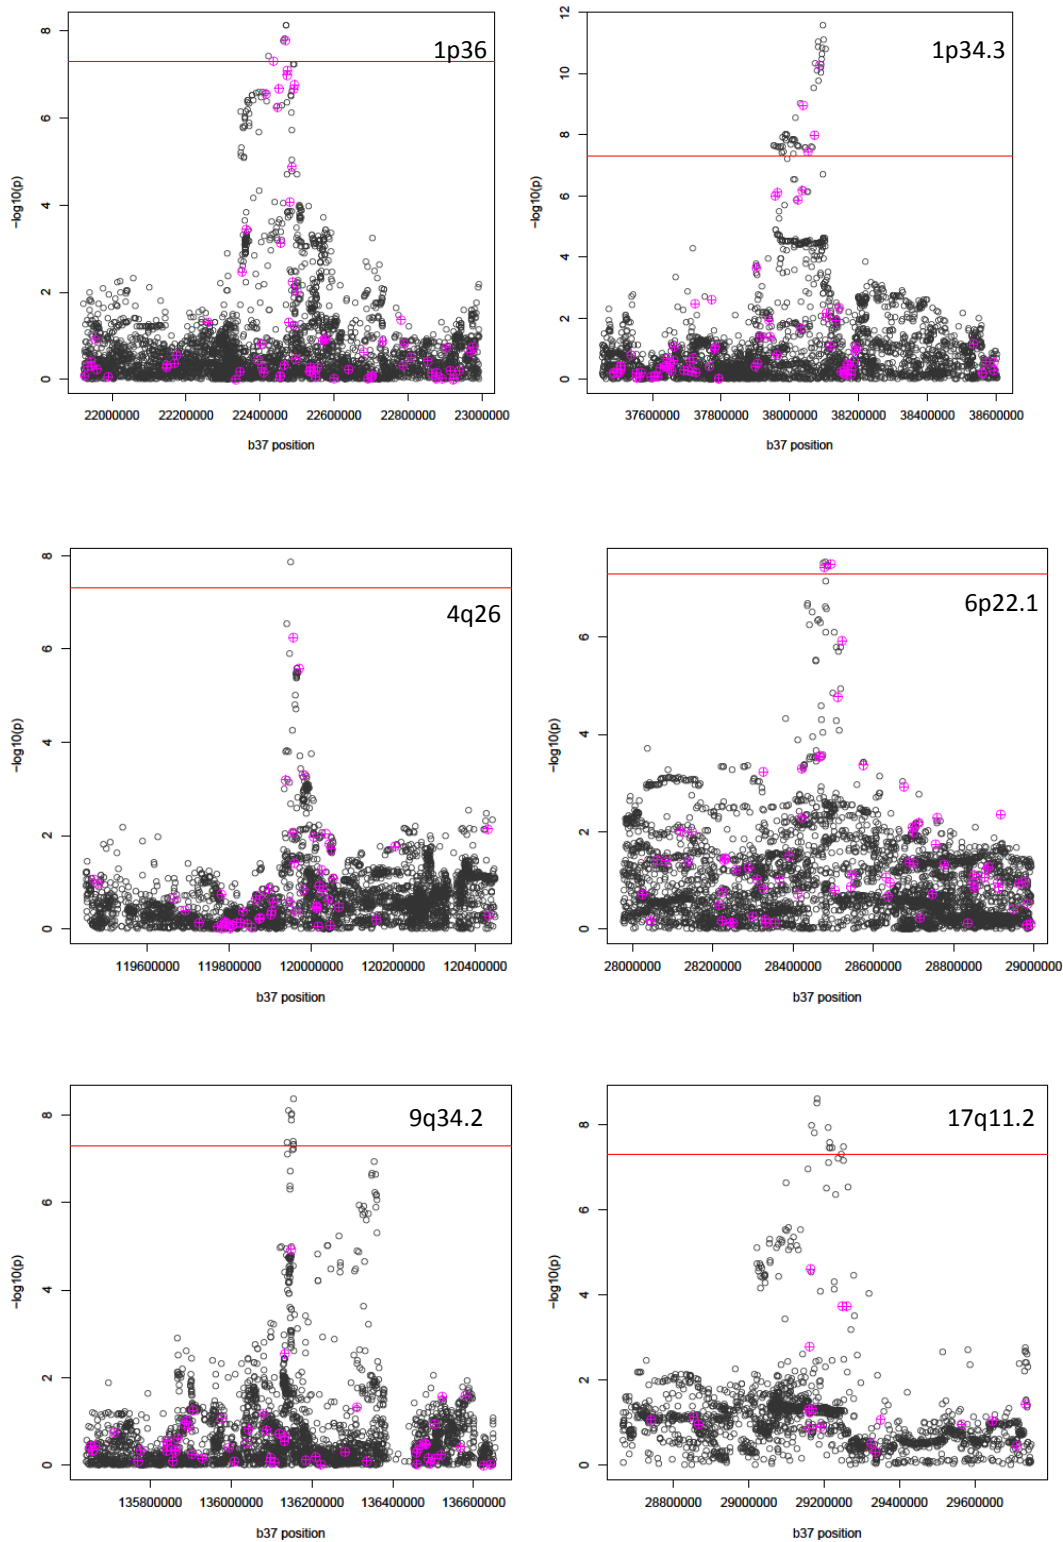

**Supplementary Figure 5.**

**Regional association plots for each novel locus based on the meta-analysis.**

For 17q11.2 the meta-analysis was based on OCAC and BRCA2 mutation carriers only. For 1p34.3 and 6p22.1, the OCAC analysis was based on serous ovarian cancer. SNPs genotyped by the iCOGS array are shown in magenta and imputed SNPs in black.

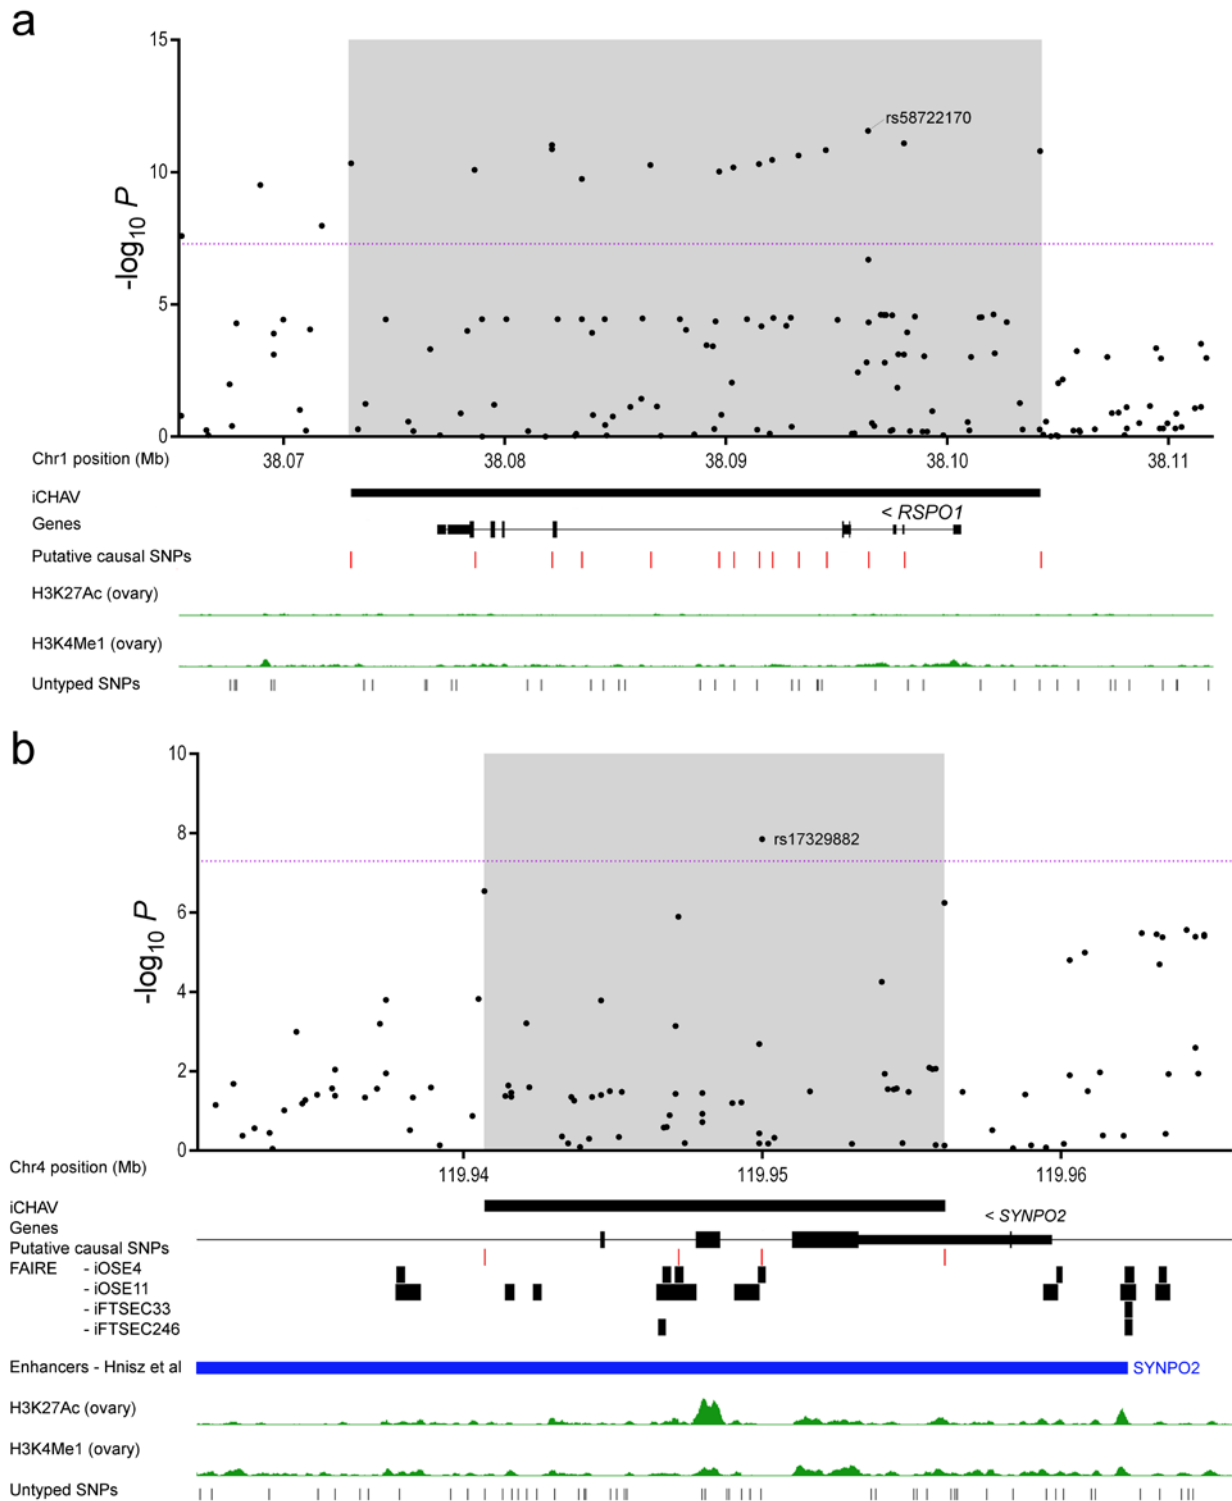

### Supplementary Figure 6

#### Ovarian cancer susceptibility loci at chromosome 1 and chromosome 4.

The Manhattan plot depicts the strength of association between all imputed and genotyped SNPs across the regions at chromosome 1 (a) and chromosome 4 (b). The dotted line represents the genome-wide significance level  $5 \times 10^{-8}$ . FAIRE-seq data revealing potential regulatory regions in ovarian and fallopian tubes cells are depicted as black bars. Additional tracks show genes and enhancers in ovary as described in Hnisz et al<sup>38</sup>. Positions of SNPs for which imputation  $r^2 < 0.3$  and/or minor allele frequency  $< 0.005$  are shown in the bottom track as 'untyped' SNPs.

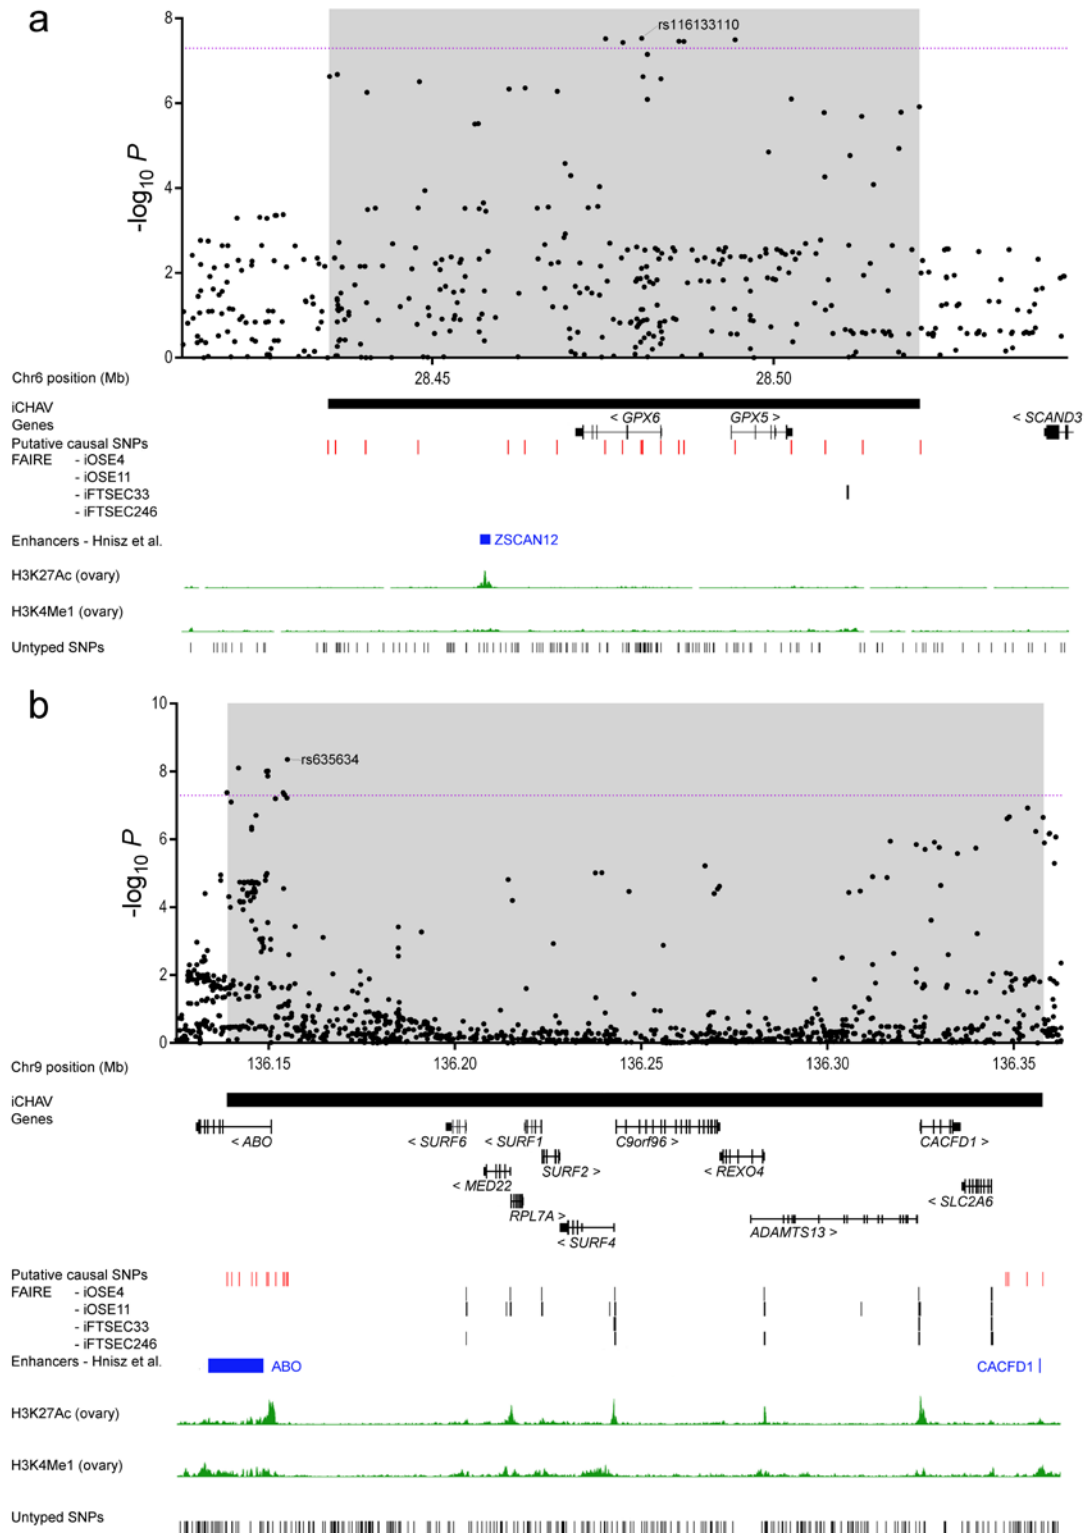

### Supplementary Figure 7

#### Ovarian cancer susceptibility loci at chromosome 6 and chromosome 9.

The Manhattan plot depicts the strength of association between all imputed and genotyped SNPs across the regions at chromosome 6 (a) and chromosome 9 (b). The dotted line represents the genome-wide significance level  $5 \times 10^{-8}$ . FAIRE-seq data revealing potential regulatory regions in ovarian and fallopian tubes cells are depicted as black bars. Additional tracks show genes and enhancers in ovary as described in Hnisz et al<sup>38</sup>. Positions of SNPs for which imputation  $r^2 < 0.3$  and/or minor allele frequency  $< 0.005$  are shown in the bottom track as 'untyped' SNPs.



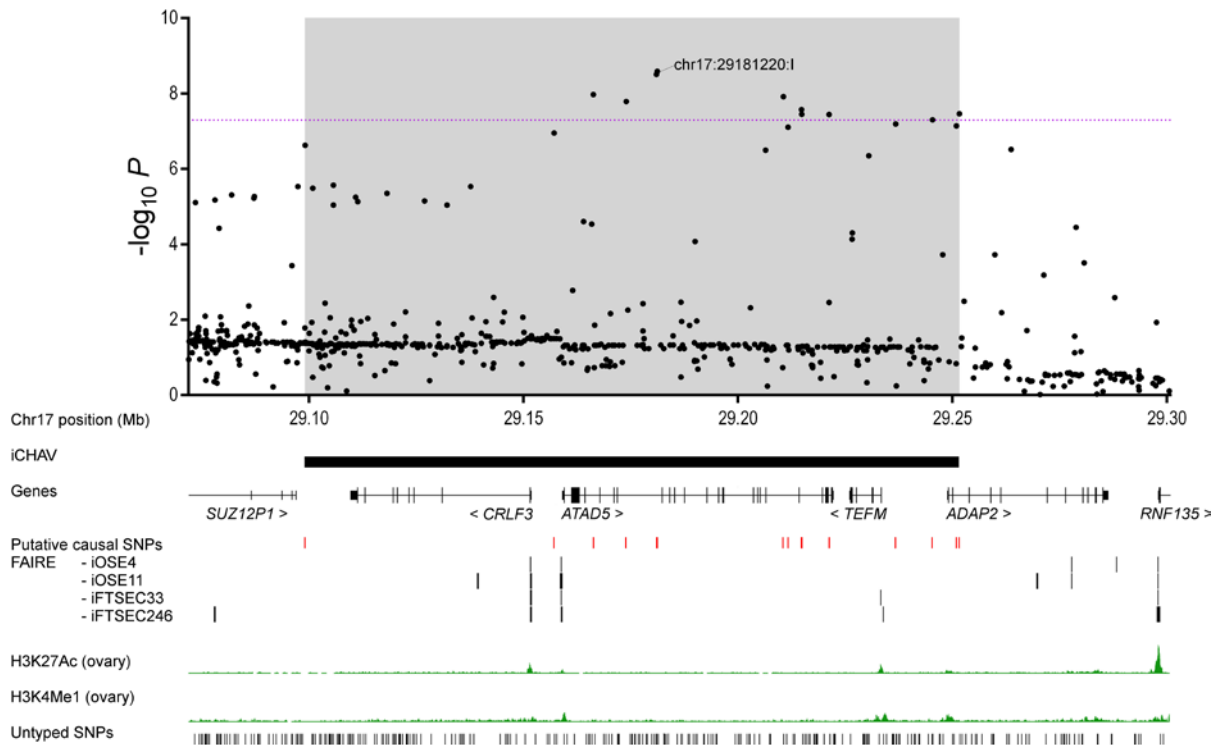

### Supplementary Figure 8

#### Ovarian cancer susceptibility locus at chromosome 17.

The Manhattan plot depicts the strength of association between all imputed and genotyped SNPs across the regions at chromosome 17. The dotted line represents the genome-wide significance level  $5 \times 10^{-8}$ . FAIRE-seq data revealing potential regulatory regions in ovarian and fallopian tubes cells are depicted as black bars. Additional tracks show genes and enhancers in ovary as described in Hnisz et al<sup>38</sup>. Positions of SNPs for which imputation  $r^2 < 0.3$  and/or minor allele frequency  $< 0.005$  are shown in the bottom track as 'untyped' SNPs.

**Supplementary Table 1.** Genotyping and imputation details for each study

| <b>Sample</b>         | <b>N</b>                      | <b>Genotyping array</b>          | <b>Genotyping centre</b>                                                                      | <b>Imputation reference panel</b> | <b>Imputation software</b>                     | <b>Imputation QC filters</b> |
|-----------------------|-------------------------------|----------------------------------|-----------------------------------------------------------------------------------------------|-----------------------------------|------------------------------------------------|------------------------------|
| <i>BRCA1</i> carriers | 15,252                        | iCOGS                            | Mayo Clinic Medical Genome Facility                                                           | 1000G v3 April 2012 CEU           | IMP2 v2, SHAPEIT                               | MAF>0.005, $r^2>0.3$         |
| <i>BRCA2</i> carriers | 8,211                         | iCOGS                            | McGill University and Génome Québec Innovation Centre                                         | 1000G v3 April 2012 CEU           | IMP2 v2, SHAPEIT                               | MAF>0.005, $r^2>0.3$         |
| OCAC-iCOGS            | 11,069 cases, 21,722 controls | iCOGS                            | McGill University and Génome Québec Innovation Centre and Mayo Clinic Medical Genome Facility | 1000G v3 April 2012 CEU           | IMP2 v2, SHAPEIT                               | $r^2>0.25$                   |
| UK GWAS               | 1,762 cases, 6,118 controls   | Illumina 550K                    | Illumina                                                                                      | 1000G v3 April 2012 CEU           | IMP2 v2, SHAPEIT                               | $r^2>0.25$                   |
| Mayo GWAS             | 441 cases, 441 controls       | HumanOmni2.5-8 BeadChip          | Mayo Clinic Medical Genome Facility                                                           | 1000G v3 April 2012 CEU           | IMP2 v2, SHAPEIT                               | $r^2>0.25$                   |
| US GWAS               | 2,165 cases, 2,564 controls   | Illumina 610-quad, 317K and 370K | POC and BWH at NCI and US at Mayo Clinic Medical Genome Facility                              | 1000G v3 April 2012 CEU           | minimac version 2012.8.15, mach version 1.0.18 | $r^2>0.25$                   |

**Supplementary Table 2.** Number of genetic variants that were genotyped and imputed on the 1000 Genomes Project data

|                                                                     | <i>BRCA1</i> carriers | <i>BRCA2</i> carriers | OCAC-iCOGS              | UK GWAS                 | US GWAS                 | U19                     |
|---------------------------------------------------------------------|-----------------------|-----------------------|-------------------------|-------------------------|-------------------------|-------------------------|
| Genotyped SNPs after QC                                             | 200,720               | 200,908               | 199,526                 | 492,956                 | 543,529*                | 1,587,051               |
| Imputed, not monomorphic                                            | 16,436,671            | 16,254,607            | 15,533,199 <sup>‡</sup> | 15,521,891 <sup>‡</sup> | 15,524,649 <sup>‡</sup> | 15,134,200 <sup>‡</sup> |
| Imputed, MAF <sup>²</sup> >0.05                                     | 6,717,256             | 6,747,730             | 6,947,385               | 6,928,746               | 6,936,998               | 6,954,339               |
| Imputed, MAF <sup>²</sup> >0.005 & r <sup>2</sup> <sup>¥</sup> >0.3 | 10,969,794            | 10,880,932            | 10,913,327              | 10,910,639              | 10,926,729              | 10,962,898              |

\* With genotype data in any of the included studies

‡ In OCAC imputation was based on the 1000 Genomes Project data with singleton sites removed

<sup>²</sup> minor allele frequency

<sup>¥</sup> imputation accuracy r<sup>2</sup>

**Supplementary Table 3.** ORs/HRs and tests of association for previously reported ovarian cancer susceptibility loci for ovarian cancer in *BRCA1* and *BRCA2* mutation carriers and for serous ovarian cancer in OCAC. Also shown are the tests of association from a meta-analysis between *BRCA1* and *BRCA2* mutation carriers and the general population samples

| Location             | Nearest gene   | rs#        | Ref <sup>6</sup> | Eff <sup>6</sup> | OCAC serous                  |                              |                  |                     |                        | <i>BRCA1</i> carriers          |                              |                                   |                       | <i>BRCA2</i> carriers          |                              |                                   |                       | MA<br>p <sup>3</sup>                  |
|----------------------|----------------|------------|------------------|------------------|------------------------------|------------------------------|------------------|---------------------|------------------------|--------------------------------|------------------------------|-----------------------------------|-----------------------|--------------------------------|------------------------------|-----------------------------------|-----------------------|---------------------------------------|
|                      |                |            |                  |                  | N ctrl <sup>1</sup><br>(EAF) | N case <sup>2</sup><br>(EAF) | EAF <sup>7</sup> | OR (95%CI)          | P                      | N unaff. <sup>1</sup><br>(MAF) | N aff. <sup>2</sup><br>(MAF) | HR (95%CI)                        | P                     | N unaff. <sup>1</sup><br>(MAF) | N aff. <sup>2</sup><br>(MAF) | HR (95%CI)                        | P                     |                                       |
| 9p22.2               | <i>BNC2</i>    | rs3814113  | A                | G                | 30845<br>(0.32)              | 9627<br>(0.28)               | 0.32             | 0.79<br>(0.76-0.82) | 2.7x10 <sup>-34</sup>  | 12788<br>(0.34)                | 2461<br>(0.29)               | 0.78<br>(0.73-0.83)               | 5.9x10 <sup>-13</sup> | 7579<br>(0.33)                 | 631<br>(0.27)                | 0.74<br>(0.65-0.84)               | 6.5x10 <sup>-6</sup>  | 5.6x10 <sup>-50</sup>                 |
| 8q24.21              | <i>CMYC</i>    | rs10088218 | G                | A                | 30845<br>(0.13)              | 9627<br>(0.11)               | 0.13             | 0.77<br>(0.73-0.82) | 1.6 x10 <sup>-20</sup> | 12790<br>(0.13)                | 2462<br>(0.13)               | 0.89<br>(0.81-0.97)               | 0.013                 | 7580<br>(0.13)                 | 631<br>(0.12)                | 0.87<br>(0.72-1.04)               | 0.13                  | 1.1 x10 <sup>-20</sup>                |
| 2q31.1               | <i>HOXD1</i>   | rs2072590  | C                | A                | 30845<br>(0.68)              | 9627<br>(0.65)               | 0.68             | 1.14<br>(1.10-1.19) | 3.7 x10 <sup>-13</sup> | 12788<br>(0.32)                | 2461<br>(0.32)               | 1.03<br>(0.96-1.10)               | 0.36                  | 7577<br>(0.31)                 | 631<br>(0.35)                | 1.25<br>(1.11-1.42)               | 6.6 x10 <sup>-4</sup> | 9.4 x10 <sup>-14</sup>                |
| 3q25.31              | <i>TIPARP</i>  | rs7651446  | C                | A                | 30845<br>(0.05)              | 9627<br>(0.08)               | 0.05             | 1.59<br>(1.48-1.70) | 1.5 x10 <sup>-38</sup> | 12789<br>(0.04)                | 2462<br>(0.06)               | 1.50<br>(1.31-1.72)               | 4.1 x10 <sup>-8</sup> | 7579<br>(0.05)                 | 631<br>(0.08)                | 1.94<br>(1.53-2.47)               | 7.9 x10 <sup>-9</sup> | 6.0 x10 <sup>-51</sup>                |
| 19p13.11             | <i>BABAM1</i>  | rs8170     | G                | A                | 30845<br>(0.19)              | 9627<br>(0.21)               | 0.19             | 1.18<br>(1.13-1.23) | 2.9 x10 <sup>-14</sup> | 12781<br>(0.19)                | 2461<br>(0.18)               | 1.04* <sup>4</sup><br>(0.94-1.15) | 0.47                  | 7573<br>(0.18)                 | 630<br>(0.21)                | 1.22* <sup>4</sup><br>(1.01-1.47) | 0.041                 | 4.6 x10 <sup>-14</sup> * <sup>4</sup> |
| 17q21.32             | <i>SKAP1</i>   | rs9303542  | A                | G                | 30845<br>(0.27)              | 9627<br>(0.30)               | 0.27             | 1.14<br>(1.10-1.19) | 4.0 x10 <sup>-12</sup> | 12778<br>(0.27)                | 2460<br>(0.28)               | 1.13<br>(1.05-1.22)               | 9.4 x10 <sup>-4</sup> | 7579<br>(0.27)                 | 631<br>(0.30)                | 1.11<br>(0.97-1.26)               | 0.11                  | 4.9 x10 <sup>-15</sup>                |
| 8q21.13              | <i>CHMP4C</i>  | rs11782652 | A                | G                | 30845<br>(0.07)              | 9627<br>(0.08)               | 0.07             | 1.24<br>(1.16-1.32) | 5.6 x10 <sup>-11</sup> | 12790<br>(0.07)                | 2462<br>(0.07)               | 1.08<br>(0.96-1.22)               | 0.17                  | 7578<br>(0.07)                 | 631<br>(0.08)                | 1.05<br>(0.84-1.30)               | 0.75                  | 2.5 x10 <sup>-10</sup>                |
| 10p12.31             | <i>MLLT10</i>  | rs1243180  | T                | A                | 30845<br>(0.31)              | 9627<br>(0.33)               | 0.3              | 1.10<br>(1.06-1.14) | 3.3 x10 <sup>-7</sup>  | 12770<br>(0.33)                | 2459<br>(0.34)               | 1.08<br>(1.01-1.16)               | 0.024                 | 7576<br>(0.32)                 | 631<br>(0.35)                | 1.19<br>(1.05-1.36)               | 4.6 x10 <sup>-3</sup> | 1.2 x10 <sup>-9</sup>                 |
| 17q12                | <i>HNF1B</i>   | rs757210   | G                | A                | 30845<br>(0.63)              | 9627<br>(0.61)               | 0.63             | 1.11<br>(1.07-1.15) | 8.2 x10 <sup>-9</sup>  | 12781<br>(0.37)                | 2459<br>(0.37)               | 1.02<br>(0.96-1.09)               | 0.48                  | 7574<br>(0.38)                 | 631<br>(0.40)                | 1.12<br>(1.00-1.26)               | 0.10                  | 1.8 x10 <sup>-8</sup>                 |
| 5p15.33              | <i>TERT</i>    | rs10069690 | G                | A                | 30845<br>(0.26)              | 9627<br>(0.28)               | 0.27             | 1.14<br>(1.10-1.19) | 7.6 x10 <sup>-11</sup> | 12778<br>(0.28)                | 2456<br>(0.26)               | 0.97* <sup>4</sup><br>(0.89-1.06) | 0.47                  | 7568<br>(0.27)                 | 630<br>(0.29)                | 1.11* <sup>4</sup><br>(0.95-1.29) | 0.21                  | 8.5 x10 <sup>-9</sup> * <sup>4</sup>  |
| 17q21.31             | <i>PLEKHM1</i> | rs183211   | G                | A                | 30845<br>(0.24)              | 9627<br>(0.26)               | 0.23             | 1.11<br>(1.07-1.16) | 1.6 x10 <sup>-7</sup>  | 12789<br>(0.23)                | 2462<br>(0.26)               | 1.19<br>(1.10-1.29)               | 7.5 x10 <sup>-6</sup> | 7580<br>(0.25)                 | 631<br>(0.30)                | 1.26<br>(1.10-1.43)               | 9.5 x10 <sup>-4</sup> | 1.9 x10 <sup>-13</sup>                |
| 4q32.3* <sup>5</sup> | <i>TRIM61</i>  | rs4691139  | A                | G                | 30845<br>(0.47)              | 9627<br>(0.48)               | 0.46             | 1.00<br>(0.97-1.03) | 0.99                   | 12790<br>(0.48)                | 2462<br>(0.52)               | 1.19<br>(1.12-1.26)               | 7.2 x10 <sup>-8</sup> | 7577<br>(0.51)                 | 630<br>(0.52)                | 1.08<br>(0.96-1.22)               | 0.22                  | 0.028                                 |

<sup>1</sup> Number of women considered unaffected in the analysis of ovarian cancer associations

<sup>2</sup> Number of women considered affected in the analysis of ovarian cancer associations

<sup>3</sup> P-value from the meta-analysis of the association between the SNP and ovarian cancer in *BRCA1* and *BRCA2* carriers and serous ovarian cancer in OCAC

\*<sup>4</sup> Ovarian cancer association in CIMBA estimated using a competing risks analysis which simultaneously models the association between ovarian and breast cancer.

\*<sup>5</sup> Previous reports found no evidence of association in OCAC or *BRCA2* mutation carriers

<sup>6</sup> Reference and effect allele

<sup>7</sup> Effect allele frequency

**Supplementary Table 4.** Number of variants associated with ovarian cancer at different levels of p-values (proportion) after quality control

| Sample                | P<0.5           | P<0.05         | P<0.001        | P<10 <sup>-5</sup>         | P<10 <sup>-6</sup>         | P<10 <sup>-7</sup>        | P<5x10 <sup>-8</sup>      |
|-----------------------|-----------------|----------------|----------------|----------------------------|----------------------------|---------------------------|---------------------------|
| <b>BRCA1 carriers</b> |                 |                |                |                            |                            |                           |                           |
| Genotyped             | 102882 (0.513)  | 11792 (0.059)  | 667 (0.003)    | 202 (0.001)                | 116 (6x10 <sup>-4</sup> )  | 66 (3x10 <sup>-4</sup> )  | 50 (3x10 <sup>-4</sup> )  |
| Imputed               | 5526028 (0.504) | 568732 (0.052) | 118984 (0.001) | 848 (7x10 <sup>-5</sup> )  | 304 (3x10 <sup>-5</sup> )  | 172 (2x10 <sup>-5</sup> ) | 136 (1x10 <sup>-5</sup> ) |
| Novel*                | 5483584 (0.503) | 558979 (0.051) | 11702 (0.001)  | 153 (2x10 <sup>-5</sup> )  | 26 (3x10 <sup>-6</sup> )   | 0                         | 0                         |
| Novel*, R2>.7         | 2972747 (0.506) | 307166 (0.052) | 7005 (0.001)   | 90 (2x10 <sup>-5</sup> )   | 17 (3x10 <sup>-6</sup> )   | 0                         | 0                         |
| Novel* regions        | -               | -              | -              | -                          | 7                          | 0                         | 0                         |
| <b>BRCA2 carriers</b> |                 |                |                |                            |                            |                           |                           |
| Genotyped             | 101647 (0.506)  | 10668 (0.053)  | 520 (0.003)    | 161 (8x10 <sup>-4</sup> )  | 122 (7x10 <sup>-4</sup> )  | 118 (6x10 <sup>-4</sup> ) | 115 (6x10 <sup>-4</sup> ) |
| Imputed               | 5501184 (0.504) | 555821 (0.051) | 17081 (0.002)  | 588 (5x10 <sup>-5</sup> )  | 304 (3x10 <sup>-5</sup> )  | 292 (3x10 <sup>-5</sup> ) | 283 (3x10 <sup>-5</sup> ) |
| Novel*                | 5439848 (0.503) | 545393 (0.051) | 12945 (0.001)  | 192 (2x10 <sup>-5</sup> )  | 2 (2x10 <sup>-6</sup> )    | 0                         | 0                         |
| Novel*, R2>.7         | 2964514 (0.504) | 300836 (0.051) | 7093 (0.001)   | 64 (1x10 <sup>-5</sup> )   | 2 (7x10 <sup>-7</sup> )    | 0                         | 0                         |
| Novel* regions        | -               | -              | -              | -                          | 2                          | 0                         | 0                         |
| <b>OCAC COGS</b>      |                 |                |                |                            |                            |                           |                           |
| Genotyped             | 102523 (0.515)  | 12576 (0.063)  | 1164 (0.006)   | 484 (0.002)                | 376 (0.002)                | 244 (0.001)               | 215 (0.001)               |
| Imputed               | 5528914 (0.507) | 596736 (0.055) | 20842 (0.002)  | 4302 (4x10 <sup>-4</sup> ) | 3528 (3x10 <sup>-4</sup> ) | 730 (7x10 <sup>-5</sup> ) | 651 (6x10 <sup>-5</sup> ) |
| Novel*                | 5485438 (0.506) | 584249 (0.054) | 15373 (0.001)  | 240 (1x10 <sup>-5</sup> )  | 16 (2x10 <sup>-6</sup> )   | 0                         | 0                         |
| Novel*, R2>.7         | 3036532 (0.508) | 332686 (0.056) | 10352 (0.002)  | 196 (3x10 <sup>-5</sup> )  | 13 (2x10 <sup>-6</sup> )   | 0                         | 0                         |
| Novel* regions        | -               | -              | -              | -                          | 6                          | 0                         | 0                         |
| <b>UKGWAS</b>         |                 |                |                |                            |                            |                           |                           |
| Genotyped             | 249051 (0.505)  | 26608 (0.054)  | 633 (0.001)    | 14 (4x10 <sup>-5</sup> )   | 6 (1x10 <sup>-5</sup> )    | 2 (4x10 <sup>-6</sup> )   | 0                         |
| Imputed               | 5503536 (0.504) | 565227 (0.052) | 12713 (0.001)  | 325 (3x10 <sup>-5</sup> )  | 194 (2x10 <sup>-5</sup> )  | 100 (1x10 <sup>-5</sup> ) | 30 (3x10 <sup>-6</sup> )  |
| Novel*                | 5464447 (0.504) | 559827 (0.052) | 12079 (0.001)  | 92 (9x10 <sup>-6</sup> )   | 16 (2x10 <sup>-6</sup> )   | 4 (4x10 <sup>-7</sup> )   | 4 (4x10 <sup>-7</sup> )   |
| Novel*, R2>.7         | 4696553 (0.505) | 486266 (0.052) | 10738 (0.001)  | 83 (9x10 <sup>-6</sup> )   | 16 (2x10 <sup>-6</sup> )   | 4 (4x10 <sup>-7</sup> )   | 4 (4x10 <sup>-7</sup> )   |
| Novel* regions        | -               | -              | -              | -                          | 4                          | 1                         | 1                         |

| <b>U19</b>                                          |                 |                |               |                             |                             |                             |                             |
|-----------------------------------------------------|-----------------|----------------|---------------|-----------------------------|-----------------------------|-----------------------------|-----------------------------|
| Genotyped                                           | 803446 (0.505)  | 78352 (0.049)  | 1475 (0.001)  | 1 ( $6 \times 10^{-7}$ )    | 0                           | 0                           | 0                           |
| Imputed                                             | 5514468 (0.503) | 504874 (0.046) | 9755 (0.001)  | 13 ( $1 \times 10^{-6}$ )   | 1 ( $9 \times 10^{-8}$ )    | 0                           | 0                           |
| Novel*                                              | 5473821 (0.503) | 496847 (0.046) | 8542 (0.001)  | 13 ( $1 \times 10^{-6}$ )   | 1 ( $9 \times 10^{-8}$ )    | 0                           | 0                           |
| Novel*, R2>.7                                       | 5005215 (0.502) | 464721 (0.047) | 8335 (0.001)  | 12 ( $1 \times 10^{-6}$ )   | 0                           | 0                           | 0                           |
| Novel* regions                                      | -               | -              | -             | -                           | 1                           | 0                           | 0                           |
| <b>USGWAS</b>                                       |                 |                |               |                             |                             |                             |                             |
| Genotyped                                           | 273122 (0.502)  | 27486 (0.051)  | 544 (0.001)   | 7 ( $1 \times 10^{-5}$ )    | 1 ( $2 \times 10^{-6}$ )    | 0                           | 0                           |
| Imputed                                             | 5495458 (0.503) | 553573 (0.051) | 9902 (0.001)  | 409 ( $4 \times 10^{-5}$ )  | 132 ( $1 \times 10^{-5}$ )  | 0                           | 0                           |
| Novel*                                              | 5454727 (0.503) | 545502 (0.050) | 9246 (0.001)  | 56 ( $5 \times 10^{-6}$ )   | 1 ( $9 \times 10^{-8}$ )    | 0                           | 0                           |
| Novel*, R2>.7                                       | 4557208 (0.503) | 458029 (0.051) | 7832 (0.001)  | 47 ( $7 \times 10^{-6}$ )   | 0                           | 0                           | 0                           |
| Novel* regions                                      | -               | -              | -             | -                           | 1                           | 0                           | 0                           |
| <b>Meta-analysis OCAC, BRCA1 and BRCA2 carriers</b> |                 |                |               |                             |                             |                             |                             |
| Imputed                                             | 5824308 (0.511) | 650171 (0.057) | 26121 (0.002) | 6228 ( $6 \times 10^{-4}$ ) | 5478 ( $5 \times 10^{-4}$ ) | 5054 ( $4 \times 10^{-4}$ ) | 4959 ( $4 \times 10^{-4}$ ) |
| Novel*                                              | 5752382 (0.510) | 632753 (0.056) | 18831 (0.002) | 550 ( $5 \times 10^{-5}$ )  | 176 ( $2 \times 10^{-5}$ )  | 35 ( $3 \times 10^{-6}$ )   | 24 ( $2 \times 10^{-6}$ )   |
| Novel* regions                                      | -               | -              | -             | -                           | 12                          | 5                           | 4                           |

\* After removing SNPs located within 1 Mb of previously reported ovarian cancer susceptibility variants. For the locus at 17q21.31 we extended the region to about 1.8 Mb because of the strong LD structure in that region.

**Supplementary Table 5.** Association test results, HR/OR estimates and meta- analysis results for novel loci. Results reported for invasive ovarian cancer in *BRCA1* and *BRCA2* mutation carriers and ovarian cancer as well as serous subtype in OCAC. Results based on first imputation. SNP with smallest p-value reported for each locus

| Location | Nearest gene  | rs#                  | OCAC all histologies |                     |                      | OCAC serous         |                      | <i>BRCA1</i> carriers |                     |                      | <i>BRCA2</i> carriers |                     |                      | MA invasive <sup>1</sup> | MA serous <sup>2</sup> |
|----------|---------------|----------------------|----------------------|---------------------|----------------------|---------------------|----------------------|-----------------------|---------------------|----------------------|-----------------------|---------------------|----------------------|--------------------------|------------------------|
|          |               |                      | r <sup>2</sup> *     | OR (95%CI)          | P                    | OR (95%CI)          | P                    | r <sup>2</sup> *      | HR (95%CI)          | P                    | r <sup>2</sup> *      | HR (95%CI)          | P                    | P                        | P                      |
| 1p36     | <i>WNT4</i>   | rs3820282            | 1                    | 1.11<br>(1.06-1.15) | 8.5x10 <sup>-7</sup> | 1.12<br>(1.07-1.17) | 3.3x10 <sup>-6</sup> | 1                     | 1.14<br>(1.04-1.25) | 4.4x10 <sup>-3</sup> | 1                     | 1.03<br>(0.87-1.23) | 0.70                 | 2.0x10 <sup>-8</sup>     | 7.7x10 <sup>-8</sup>   |
| 1p34.3   | <i>RSPO1</i>  | rs12039431           | 0.92                 | 1.07<br>(1.03-1.11) | 4.4x10 <sup>-4</sup> | 1.11<br>(1.07-1.16) | 5.1x10 <sup>-7</sup> | 0.92                  | 1.14<br>(1.06-1.23) | 6.1x10 <sup>-4</sup> | 0.92                  | 1.29<br>(1.12-1.49) | 3.8x10 <sup>-4</sup> | 1.1x10 <sup>-8</sup>     | 1.4x10 <sup>-11</sup>  |
| 4q26     | <i>SYNPO2</i> | rs17329882           | 0.95                 | 1.09<br>(1.06-1.13) | 3.9x10 <sup>-7</sup> | 1.11<br>(1.07-1.16) | 2.7x10 <sup>-7</sup> | 0.95                  | 1.07<br>(0.99-1.15) | 0.08                 | 0.95                  | 1.14<br>(0.99-1.31) | 0.08                 | 2.2 x10 <sup>-8</sup>    | 2.0x10 <sup>-8</sup>   |
| 6p22.1   | <i>GPX6</i>   | rs115344852          | 1                    | 0.94<br>(0.91-0.97) | 7.5x10 <sup>-5</sup> | 0.91<br>(0.87-0.94) | 2.7x10 <sup>-7</sup> | 1                     | 0.92<br>(0.86-0.99) | 0.024                | 1                     | 0.97<br>(0.86-1.10) | 0.65                 | 5.8x10 <sup>-6</sup>     | 3.2x10 <sup>-8</sup>   |
| 9q34.2   | <i>ABO</i>    | chr9:136138          | 0.74                 | 1.15<br>(1.10-1.21) | 6.0x10 <sup>-9</sup> | 1.17<br>(1.11-1.24) | 2.4x10 <sup>-8</sup> | 0.75                  | 1.12<br>(1.01-1.24) | 0.032                | 0.75                  | 0.94<br>(0.78-1.15) | 0.56                 | 3.3x10 <sup>-9</sup>     | 2.0x10 <sup>-8</sup>   |
| 16q21    |               | 765:D<br>rs8044477   | 0.73                 | 1.10<br>(1.06-1.13) | 1.3x10 <sup>-7</sup> | 1.10<br>(1.06-1.15) | 2.2x10 <sup>-6</sup> | 0.75                  | 1.08<br>(1.00-1.16) | 0.047                | 0.75                  | 1.08<br>(0.94-1.24) | 0.27                 | 1.0x10 <sup>-8</sup>     | 1.7x10 <sup>-7</sup>   |
| 17q11.2  | <i>ATAD5</i>  | chr17:29181<br>220:I | 0.97                 | 0.90<br>(0.87-0.93) | 1.2x10 <sup>-9</sup> | 0.90<br>(0.86-0.94) | 1.3x10 <sup>-7</sup> | 0.97                  | 1.02<br>(0.95-1.09) | 0.62                 | 0.97                  | 0.92<br>(0.81-1.06) | 0.24                 | 6.4x10 <sup>-10*</sup>   | 6.8x10 <sup>-8*</sup>  |

\* Imputation accuracy r<sup>2</sup> estimate

<sup>1</sup> P-value from the meta-analysis association test for ovarian cancer in OCAC and *BRCA1* and *BRCA2* carriers

<sup>2</sup> P-value from the meta-analysis association test for ovarian cancer in *BRCA1* and *BRCA2* carriers and serous ovarian cancer in OCAC

<sup>3</sup> meta-analysis of ovarian cancer associations in *BRCA2* carriers and OCAC only



**Supplementary Table 6.** Ovarian cancer association tests in OCAC, *BRCA1* and *BRCA2* carriers and combined analysis for the most strongly associated genotyped SNP within a 500Mb region around the lead SNP of each novel locus

| Locus   | SNP        | Position  | Ref <sup>*5</sup> | Eff <sup>*5</sup> | R <sup>2</sup> * <sup>2</sup> | Lead SNP        | OCAC                |      |                                      | <i>BRCA1</i> carriers |      |                       | <i>BRCA2</i> carriers |      |                       | Meta-analysis* <sup>1</sup><br>P      |
|---------|------------|-----------|-------------------|-------------------|-------------------------------|-----------------|---------------------|------|--------------------------------------|-----------------------|------|-----------------------|-----------------------|------|-----------------------|---------------------------------------|
|         |            |           |                   |                   |                               |                 | HR (95%CI)          | EA   | P                                    | HR (95%CI)            | EA   | P                     | HR (95%CI)            | EA   | P                     |                                       |
| 1p36    | rs3820282  | 22468215  | T                 | C                 | 0.94                          | rs56318008      | 1.11<br>(1.06-1.15) | 0.15 | 6.8x10 <sup>-7</sup>                 | 1.14<br>(1.04-1.25)   | 0.14 | 4.4 x10 <sup>-3</sup> | 1.03<br>(0.87-1.22)   | 0.14 | 0.70                  | 1.6 x10 <sup>-8</sup>                 |
| 1q34.3  | rs12023270 | 38086578  | T                 | C                 | 0.73                          | rs58722170      | 1.10<br>(1.06-1.14) | 0.26 | 2.7 x10 <sup>-6</sup> * <sup>3</sup> | 1.13<br>(1.05-1.21)   | 0.27 | 5.3 x10 <sup>-4</sup> | 1.27<br>(1.12-1.44)   | 0.28 | 1.2 x10 <sup>-4</sup> | 5.3 x10 <sup>-11</sup> * <sup>3</sup> |
| 4q26    | rs752097   | 119956089 | A                 | G                 | 0.86                          | rs17329882      | 1.08<br>(1.04-1.12) | 0.23 | 1.6 x10 <sup>-5</sup>                | 1.08<br>(1.00-1.16)   | 0.24 | 0.051                 | 1.12<br>(0.98-1.28)   | 0.23 | 0.08                  | 5.7 x10 <sup>-7</sup>                 |
| 6p22.1  | rs445870   | 28494327  | A                 | G                 | 0.97                          | rs116133110     | 0.91<br>(0.87-0.94) | 0.30 | 2.5 x10 <sup>-7</sup> * <sup>3</sup> | 0.93<br>(0.86-1.00)   | 0.29 | 0.040                 | 0.96<br>(0.84-1.09)   | 0.30 | 0.44                  | 3.2 x10 <sup>-8</sup> * <sup>3</sup>  |
| 9q34.2  | rs505922   | 136149229 | T                 | C                 | 0.39                          | rs635634        | 1.05<br>(1.02-1.09) | 0.34 | 6.5 x10 <sup>-4</sup>                | 1.08<br>(1.02-1.16)   | 0.36 | 0.011                 | 1.09<br>(0.97-1.23)   | 0.35 | 0.16                  | 1.2 x10 <sup>-5</sup>                 |
| 17q11.2 | rs3764419  | 29164023  | A                 | C                 | 0.57                          | chr17:29181220: | 0.94<br>(0.91-0.97) | 0.39 | 3.6 x10 <sup>-5</sup>                | 1.02<br>(0.95-1.08)   | 0.39 | 0.68                  | 0.94<br>(0.83-1.07)   | 0.38 | 0.39                  | 2.5 x10 <sup>-5</sup> * <sup>4</sup>  |

\*<sup>1</sup> p-value for the meta-analysis of invasive ovarian cancer for OCAC, *BRCA1* and *BRCA2* carriers unless stated otherwise

\*<sup>2</sup> R<sup>2</sup> for the correlation with the most strongly associated SNP for each region (SNPs shown adjacent column) based on data from the 1000 Genomes Project v3

\*<sup>3</sup> results for association with serous ovarian cancer in OCAC

\*<sup>4</sup> meta-analysis for results from OCAC and from *BRCA2* mutation carriers

\*<sup>5</sup> Reference and effect allele

**Supplementary Table 7.** Ovarian cancer association of the imputed lead SNP at the 17q11.2 locus and of a correlated ( $r^2=0.95$ ) haplotype based on two genotyped SNPs using data from the samples genotyped on the iCOGS array (14,733 ovarian cancer cases and 23,480 controls from OCAC-COGS and from 7,562 unaffected and 623 affected *BRCA2* mutation carriers).

| Variant          | OCAC-COGS           |                      | BRCA2 carriers      |      | Meta-analysis        |
|------------------|---------------------|----------------------|---------------------|------|----------------------|
|                  | OR (95%CI)          | p                    | HR (95%CI)          | p    | p                    |
| chr17:29181220:I | 0.91<br>(0.88-0.94) | $1.9 \times 10^{-8}$ | 0.92<br>(0.80-1.05) | 0.23 | $1.8 \times 10^{-8}$ |
| AA haplotype*    | 0.91<br>(0.88-0.95) | $1.1 \times 10^{-7}$ | 0.92<br>(0.81-1.04) | 0.19 | $8.6 \times 10^{-8}$ |

\* AA haplotype based on genotyped SNPs rs9910051 (AT) and rs3764419 (CA)

**Supplementary Table 8.** CIMBA competing risks association test results and HR estimates for ovarian and breast cancer for the most significantly associated genotyped SNP from each novel locus. Genotyped SNP with smallest p-value reported for each locus

| Location | rs#        | r <sup>2</sup> * | <i>BRCA1</i> carriers OC* |                      | <i>BRCA1</i> carriers BC* |      | <i>BRCA2</i> carriers OC* |                      | <i>BRCA2</i> carriers BC* |      |
|----------|------------|------------------|---------------------------|----------------------|---------------------------|------|---------------------------|----------------------|---------------------------|------|
|          |            |                  | HR (95%CI)                | P                    | HR (95%)                  | P    | HR (95%CI)                | P                    | HR (95%CI)                | P    |
| 1p36     | rs3820282  | 0.94             | 1.12<br>(1.00-1.25)       | 0.052                | 1.01<br>(0.94-1.07)       | 0.87 | 1.03<br>(0.83-1.28)       | 0.77                 | 1.02<br>(0.93-1.12)       | 0.66 |
| 1p34.3   | rs12023270 | 0.73             | 1.10<br>(1.01-1.20)       | 0.037                | 0.98<br>(0.94-1.03)       | 0.49 | 1.29<br>(1.11-1.51)       | 1.1x10 <sup>-3</sup> | 0.98<br>(0.92-1.05)       | 0.59 |
| 4q26     | rs752097   | 0.86             | 1.07<br>(0.98-1.17)       | 0.15                 | 0.98<br>(0.94-1.04)       | 0.54 | 1.17<br>(0.99-1.38)       | 0.054                | 0.99<br>(0.93-1.07)       | 0.87 |
| 6p22.1   | rs445870   | 0.97             | 0.88<br>(0.81-0.97)       | 6.6x10 <sup>-3</sup> | 0.99<br>(0.95-1.05)       | 0.82 | 0.99<br>(0.85-1.17)       | 0.98                 | 0.99<br>(0.93-1.06)       | 0.75 |
| 9q34.2   | rs505922   | 0.39             | 1.10<br>(1.01-1.19)       | 0.027                | 1.02<br>(0.97-1.06)       | 0.53 | 1.10<br>(0.95-1.27)       | 0.20                 | 0.98<br>(0.92-1.04)       | 0.45 |
| 17q11.2  | rs3764419  | 0.57             | 1.04<br>(0.96-1.12)       | 0.36                 | 1.00<br>(0.96-1.05)       | 0.99 | 0.93<br>(0.81-1.08)       | 0.36                 | 0.95<br>(0.89-1.01)       | 0.09 |

\* BC = breast cancer, OC = ovarian cancer

**Supplementary Table 9.** Pupasuite data for all putative causal SNPs

| loci | SNP             | chromosome | position | MinFreq | MaxFreq | pupasuite position * | pupasuite results | pupasuite results |
|------|-----------------|------------|----------|---------|---------|----------------------|-------------------|-------------------|
| 1p36 | rs12407439      | 1          | 22347396 | 0.84    | 0.86    | UPSTREAM             |                   |                   |
| 1p36 | rs111992780     | 1          | 22361229 | 0.15    | 0.17    |                      |                   |                   |
| 1p36 | rs12405695      | 1          | 22365689 | 0.15    | 0.16    | INTERGENIC           |                   |                   |
| 1p36 | rs10799731      | 1          | 22365829 | 0.84    | 0.85    | INTERGENIC           |                   |                   |
| 1p36 | rs10917128      | 1          | 22366102 | 0.84    | 0.85    | INTERGENIC           |                   |                   |
| 1p36 | rs72665317      | 1          | 22367073 | 0.83    | 0.85    | INTERGENIC           |                   |                   |
| 1p36 | rs10917130      | 1          | 22371065 | 0.84    | 0.85    | INTERGENIC           |                   |                   |
| 1p36 | rs725158        | 1          | 22378280 | 0.15    | 0.17    | UPSTREAM             |                   |                   |
| 1p36 | rs3754496       | 1          | 22378880 | 0.16    | 0.17    | UPSTREAM             |                   |                   |
| 1p36 | chr1:22381399:D | 1          | 22381399 | 0.20    | 0.21    |                      |                   |                   |
| 1p36 | rs17837951      | 1          | 22388872 | 0.15    | 0.17    | INTRONIC             |                   |                   |
| 1p36 | chr1:22396288:D | 1          | 22396288 | 0.16    | 0.17    |                      |                   |                   |
| 1p36 | rs12038474      | 1          | 22403357 | 0.16    | 0.17    | INTRONIC             |                   |                   |
| 1p36 | chr1:22407102:D | 1          | 22407102 | 0.83    | 0.85    |                      |                   |                   |
| 1p36 | rs2268179       | 1          | 22414785 | 0.16    | 0.17    | INTRONIC             | conserved region  |                   |
| 1p36 | rs2268177       | 1          | 22415410 | 0.83    | 0.85    | INTRONIC             | conserved region  |                   |
| 1p36 | chr1:22418260:I | 1          | 22418260 | 0.15    | 0.17    |                      |                   |                   |
| 1p36 | rs10917151      | 1          | 22422721 | 0.14    | 0.16    | DOWNSTREAM           |                   |                   |
| 1p36 | rs7412010       | 1          | 22436446 | 0.14    | 0.16    | INTERGENIC           |                   |                   |
| 1p36 | rs10737462      | 1          | 22444975 | 0.20    | 0.22    | DOWNSTREAM           | conserved region  |                   |
| 1p36 | rs3765350       | 1          | 22447316 | 0.78    | 0.80    | INTRONIC             | conserved region  |                   |
| 1p36 | rs2235529       | 1          | 22450487 | 0.14    | 0.15    | INTRONIC             | conserved region  |                   |
| 1p36 | rs12404660      | 1          | 22458794 | 0.81    | 0.83    | INTRONIC             | conserved region  |                   |
| 1p36 | rs12037376      | 1          | 22462111 | 0.14    | 0.15    | INTRONIC             | conserved region  |                   |
| 1p36 | rs61768001      | 1          | 22465820 | 0.85    | 0.86    | INTRONIC             | conserved region  | triplex           |
| 1p36 | rs3820282       | 1          | 22468215 | 0.14    | 0.15    | INTRONIC             | conserved region  |                   |

|        |                  |   |           |      |      |            |                  |
|--------|------------------|---|-----------|------|------|------------|------------------|
| 1p36   | rs56318008       | 1 | 22470407  | 0.13 | 0.15 | 5PRIME_UTR | conserved region |
| 1p36   | rs55938609       | 1 | 22470451  | 0.13 | 0.15 | 5PRIME_UTR | conserved region |
| 1p36   | rs7519889        | 1 | 22472506  | 0.20 | 0.20 | UPSTREAM   |                  |
| 1p36   | rs12042083       | 1 | 22472732  | 0.20 | 0.20 | UPSTREAM   | conserved region |
| 1p36   | rs7515106        | 1 | 22473410  | 0.79 | 0.80 | UPSTREAM   |                  |
| 1p36   | rs12410251       | 1 | 22482629  | 0.19 | 0.20 | INTERGENIC |                  |
| 1p36   | chr1:22483649:I  | 1 | 22483649  | 0.75 | 0.77 |            |                  |
| 1p36   | rs3971300        | 1 | 22484575  | 0.73 | 0.74 | INTERGENIC |                  |
| 1p36   | rs56104760       | 1 | 22486029  | 0.82 | 0.84 | INTERGENIC |                  |
| 1p36   | rs72478520       | 1 | 22489567  | 0.16 | 0.18 | INTERGENIC |                  |
| 1p36   | rs7521902        | 1 | 22490724  | 0.21 | 0.23 | INTERGENIC |                  |
| 1p36   | rs4654785        | 1 | 22491843  | 0.76 | 0.78 | INTERGENIC |                  |
| 1p36   | rs3920498        | 1 | 22492887  | 0.18 | 0.20 | INTERGENIC | conserved region |
| 1p34.3 | rs61776206       | 1 | 38073048  | 0.24 | 0.26 | DOWNSTREAM | conserved region |
| 1p34.3 | rs55852308       | 1 | 38078630  | 0.72 | 0.74 | INTRONIC   | conserved region |
| 1p34.3 | rs12039431       | 1 | 38082122  | 0.23 | 0.24 | INTRONIC   | conserved region |
| 1p34.3 | rs12046650       | 1 | 38082123  | 0.23 | 0.25 | INTRONIC   | conserved region |
| 1p34.3 | rs72659423       | 1 | 38083472  | 0.26 | 0.28 | INTRONIC   |                  |
| 1p34.3 | rs12023270       | 1 | 38086578  | 0.26 | 0.28 | INTRONIC   |                  |
| 1p34.3 | rs61776208       | 1 | 38089683  | 0.26 | 0.28 | INTRONIC   |                  |
| 1p34.3 | rs61776209       | 1 | 38090323  | 0.26 | 0.28 | INTRONIC   |                  |
| 1p34.3 | rs61776210       | 1 | 38091488  | 0.26 | 0.28 | INTRONIC   |                  |
| 1p34.3 | rs4073473        | 1 | 38092075  | 0.26 | 0.28 | INTRONIC   |                  |
| 1p34.3 | rs61776211       | 1 | 38093277  | 0.26 | 0.28 | INTRONIC   |                  |
| 1p34.3 | rs61776212       | 1 | 38094512  | 0.73 | 0.74 | INTRONIC   |                  |
| 1p34.3 | rs58722170       | 1 | 38096421  | 0.23 | 0.24 | INTRONIC   | conserved region |
| 1p34.3 | rs4335340        | 1 | 38098035  | 0.73 | 0.74 | INTRONIC   | conserved region |
| 1p34.3 | rs12120061       | 1 | 38104194  | 0.25 | 0.25 | UPSTREAM   |                  |
| 4q26   | chr4:119940713:D | 4 | 119940713 | 0.74 | 0.75 |            |                  |
| 4q26   | rs7671665        | 4 | 119947188 | 0.67 | 0.69 | INTRONIC   | conserved region |
| 4q26   | rs17329882       | 4 | 119949960 | 0.76 | 0.77 | INTRONIC   | conserved region |
| 4q26   | rs752097         | 4 | 119956089 | 0.23 | 0.24 | 3PRIME_UTR | conserved region |

|        |                  |   |           |      |      |            |                  |
|--------|------------------|---|-----------|------|------|------------|------------------|
| 6p22.1 | rs2191035        | 6 | 28434943  | 0.71 | 0.72 | INTERGENIC |                  |
| 6p22.1 | rs2531815        | 6 | 28436060  | 0.28 | 0.29 | INTERGENIC |                  |
| 6p22.1 | rs1016069        | 6 | 28440418  | 0.25 | 0.26 | INTERGENIC |                  |
| 6p22.1 | rs1015811        | 6 | 28448086  | 0.75 | 0.75 | UPSTREAM   |                  |
| 6p22.1 | rs2859355        | 6 | 28461221  | 0.30 | 0.32 | INTERGENIC |                  |
| 6p22.1 | rs2227228        | 6 | 28463576  | 0.68 | 0.70 | INTERGENIC | conserved region |
| 6p22.1 | rs2531822        | 6 | 28468301  | 0.30 | 0.32 | DOWNSTREAM |                  |
| 6p22.1 | rs7743046        | 6 | 28475368  | 0.29 | 0.31 | INTRONIC   |                  |
| 6p22.1 | rs4713167        | 6 | 28477895  | 0.69 | 0.71 | INTRONIC   | conserved region |
| 6p22.1 | rs116133110      | 6 | 28480635  | 0.69 | 0.71 |            |                  |
| 6p22.1 | rs115095247      | 6 | 28480833  | 0.68 | 0.69 |            |                  |
| 6p22.1 | chr6:28481485:D  | 6 | 28481485  | 0.27 | 0.29 |            |                  |
| 6p22.1 | chr6:28481486:D  | 6 | 28481486  | 0.30 | 0.31 |            |                  |
| 6p22.1 | rs116131800      | 6 | 28483482  | 0.68 | 0.69 |            |                  |
| 6p22.1 | rs115344852      | 6 | 28486098  | 0.69 | 0.71 |            |                  |
| 6p22.1 | rs115771114      | 6 | 28486822  | 0.69 | 0.71 |            |                  |
| 6p22.1 | rs445870         | 6 | 28494327  | 0.70 | 0.71 | INTRONIC   | conserved region |
| 6p22.1 | rs115878751      | 6 | 28502550  | 0.71 | 0.72 |            |                  |
| 6p22.1 | rs114159316      | 6 | 28507379  | 0.76 | 0.77 |            |                  |
| 6p22.1 | rs115769866      | 6 | 28512882  | 0.22 | 0.23 |            |                  |
| 6p22.1 | chr6:28518640:D  | 6 | 28518640  | 0.23 | 0.24 |            |                  |
| 6p22.1 | rs393414         | 6 | 28521316  | 0.22 | 0.23 | INTERGENIC |                  |
| 9q34.2 | chr9:136138765:D | 9 | 136138765 | 0.14 | 0.14 |            |                  |
| 9q34.2 | chr9:136139907:D | 9 | 136139907 | 0.26 | 0.27 |            |                  |
| 9q34.2 | rs2519093        | 9 | 136141870 | 0.19 | 0.20 | INTRONIC   |                  |
| 9q34.2 | rs9411378        | 9 | 136145425 | 0.23 | 0.23 | INTRONIC   |                  |
| 9q34.2 | rs550057         | 9 | 136146597 | 0.26 | 0.27 | INTRONIC   |                  |
| 9q34.2 | rs507666         | 9 | 136149399 | 0.19 | 0.20 | INTRONIC   |                  |
| 9q34.2 | chr9:136149709:D | 9 | 136149709 | 0.18 | 0.19 |            |                  |
| 9q34.2 | rs532436         | 9 | 136149830 | 0.19 | 0.20 | INTRONIC   |                  |
| 9q34.2 | rs600038         | 9 | 136151806 | 0.78 | 0.79 | UPSTREAM   |                  |
| 9q34.2 | rs651007         | 9 | 136153875 | 0.21 | 0.22 | UPSTREAM   |                  |

|         |                  |    |           |      |      |            |                  |
|---------|------------------|----|-----------|------|------|------------|------------------|
| 9q34.2  | rs579459         | 9  | 136154168 | 0.78 | 0.79 | UPSTREAM   |                  |
| 9q34.2  | rs649129         | 9  | 136154304 | 0.21 | 0.22 | UPSTREAM   |                  |
| 9q34.2  | rs495828         | 9  | 136154867 | 0.21 | 0.22 | UPSTREAM   |                  |
| 9q34.2  | rs635634         | 9  | 136155000 | 0.19 | 0.20 | UPSTREAM   |                  |
| 9q34.2  | rs56963659       | 9  | 136348194 | 0.10 | 0.12 | UPSTREAM   |                  |
| 9q34.2  | rs73550898       | 9  | 136348753 | 0.10 | 0.11 | UPSTREAM   |                  |
| 9q34.2  | rs7875786        | 9  | 136353663 | 0.10 | 0.11 | INTERGENIC |                  |
| 9q34.2  | rs7864157        | 9  | 136357925 | 0.10 | 0.11 | INTERGENIC |                  |
| 17q11.2 | rs9900596        | 17 | 29099077  | 0.82 | 0.83 | INTERGENIC |                  |
| 17q11.2 | rs74815160       | 17 | 29157158  | 0.80 | 0.82 |            |                  |
| 17q11.2 | rs62070643       | 17 | 29166302  | 0.73 | 0.74 | INTRONIC   |                  |
| 17q11.2 | rs62070644       | 17 | 29173948  | 0.26 | 0.27 | INTRONIC   |                  |
| 17q11.2 | rs62070645       | 17 | 29180996  | 0.25 | 0.27 | INTRONIC   |                  |
| 17q11.2 | chr17:29181220:l | 17 | 29181220  | 0.72 | 0.74 |            |                  |
| 17q11.2 | rs62070648       | 17 | 29210595  | 0.26 | 0.27 | INTRONIC   |                  |
| 17q11.2 | rs7223535        | 17 | 29211667  | 0.26 | 0.27 | INTRONIC   |                  |
| 17q11.2 | rs111305917      | 17 | 29214795  | 0.73 | 0.74 |            |                  |
| 17q11.2 | rs113934718      | 17 | 29214880  | 0.26 | 0.27 |            |                  |
| 17q11.2 | rs62070651       | 17 | 29214896  | 0.73 | 0.74 | INTRONIC   |                  |
| 17q11.2 | rs62070652       | 17 | 29221277  | 0.26 | 0.27 | INTRONIC   | conserved region |
| 17q11.2 | rs35958868       | 17 | 29236745  | 0.26 | 0.27 | UPSTREAM   |                  |
| 17q11.2 | rs62068770       | 17 | 29245375  | 0.73 | 0.74 | UPSTREAM   |                  |
| 17q11.2 | rs11867227       | 17 | 29250911  | 0.26 | 0.27 | INTRONIC   |                  |
| 17q11.2 | rs35840638       | 17 | 29251641  | 0.25 | 0.27 | INTRONIC   | conserved region |

\* Only SNPs with rs numbers could be analyzed but, even for those, position output was not available for all. <http://pupasuite.bioinfo.cipf.es>

**Supplementary Table 10.** Index SNPs at each of the novel loci, and biofeatures of putatively causal SNPs at each locus

| Chr. | Closest Gene | Position of index SNPs         | No. putatively causal SNPs | kb window | All genes in window           | No. putatively causal SNPs aligned with biofeatures | putatively causal SNP with biofeatures | Location    | Chromatin mark   | Cell type                           |
|------|--------------|--------------------------------|----------------------------|-----------|-------------------------------|-----------------------------------------------------|----------------------------------------|-------------|------------------|-------------------------------------|
| 1p36 | <i>WNT4</i>  | promoter region of <i>WNT4</i> | 39                         | 145       | <i>WNT4, CDC42, LINC00339</i> | 11                                                  | rs72665317                             | Intergenic  | H3K4me1          | Mainly in OSECs/ FTSECs             |
|      |              |                                |                            |           |                               |                                                     | rs10917130                             | Intergenic  | H3K4me1          | Mainly OSECs/ FTSECs, some CaOV3    |
|      |              |                                |                            |           |                               |                                                     | rs725158                               | promoter    | H3K4me1          | Only in ENCODE FAIRE, FAIRE/H3K4me1 |
|      |              |                                |                            |           |                               |                                                     | rs3754496                              | promoter    | H3K4me1          | 1 mainly in OSECs/ FTSECs           |
|      |              |                                |                            |           |                               |                                                     | rs2268177                              | intron      | H3K27ac, H3K4me1 | Only in OSECs/ FTSECs               |
|      |              |                                |                            |           |                               |                                                     | rs10917151                             | Intergenic  | H3K4me1          | Only in OSECs                       |
|      |              |                                |                            |           |                               |                                                     | rs2092322                              | Intergenic  | H3K4me1          | Only OSE11                          |
|      |              |                                |                            |           |                               |                                                     | rs10737462                             | 3'UTR       | H3K4me1          | Only in FTE33                       |
|      |              |                                |                            |           |                               |                                                     | rs12404660                             | intron      | H3K27ac, H3K4me1 | Mainly in OSECs/ FTSECs             |
|      |              |                                |                            |           |                               |                                                     | rs56318008                             | intron      | H3K27ac, H3K4me1 | Very strong in CaOV3                |
|      |              |                                |                            |           |                               |                                                     | rs55938609                             | promoter    | H3K4me1          | Very strong in                      |
|      |              |                                |                            |           |                               |                                                     |                                        | <i>WNT4</i> | H3K27ac,         |                                     |



|         |               |                                           |    |      |                                                                                                                                                                                  |   |             | promoter                | H3K4me1                       | CaOV3                               |
|---------|---------------|-------------------------------------------|----|------|----------------------------------------------------------------------------------------------------------------------------------------------------------------------------------|---|-------------|-------------------------|-------------------------------|-------------------------------------|
| 1p34.3  | <i>RSPO1</i>  | intron 3<br>of <i>RSPO1</i>               | 15 | 31   | <i>RSPO1</i>                                                                                                                                                                     | 0 |             |                         |                               |                                     |
| 4q26    | <i>SYNPO2</i> | intron 3<br>of<br><i>SYNPO2</i>           | 4  | 35   | <i>SYNPO2</i>                                                                                                                                                                    | 2 | rs7671665   | <i>SYNPO2</i><br>intron | FAIRE,<br>H3K27ac,<br>H3K4me1 | H3K4me1 only<br>in OSECs/<br>FTSECs |
|         |               |                                           |    |      |                                                                                                                                                                                  |   | rs17329882  | <i>SYNPO2</i><br>intron | FAIRE,<br>H3K27ac             | Only in OSECs                       |
| 6p22.1  | <i>GPX6</i>   | intron 1<br>of <i>GPX6</i>                | 22 | 130  | <i>GPX6, GPX5</i>                                                                                                                                                                | 1 | rs115878751 | <i>GPX5</i> 3'UTR       | none                          | N/A                                 |
| 9q34.2  | <i>ABO</i>    | 4.3kb<br>upstream<br>of <i>ABO</i><br>TSS | 18 | 329* | <i>ABO, SURF6,<br/>MED22, RPL7A,<br/>SNORD24,<br/>SNORD36B,<br/>SNORD36A,<br/>SNORD36C, SURF1,<br/>SURF2, SURF4,<br/>C9orf96, REXO4,<br/>ADAMTS13,<br/>CACFD1, <b>SLC2A6</b></i> | 1 | rs532436    | <i>ABO</i> intron       | H3H3K27<br>ac,<br>H3K4me1     | Only in CaOV3                       |
| 17q11.2 | <i>ATAD5</i>  | intron 6<br>of <i>ATAD5</i>               | 16 | 229  | <i>ATAD5, TEFM,<br/>ADAP2, CRLF3,<br/>SUZ12P1</i>                                                                                                                                | 0 |             |                         |                               |                                     |

\* SNPs in this large window are either within or upstream of *ABO* or upstream of *SLC2A6*. Bold indicates these genes in gene list. None indicates no SNPs overlapped with biofeatures. N/A is not applicable. TSS = transcription start site

**Supplementary Table 11.** Summary of TCGA tumor data for all the genes in 1MB region around the top SNP at each locus

| chr region                                                        | 1p36                                                                                         | 1p34.3                                         | 4q26                                         | 6p22.1                                                        | 9q34.2                                             | 17q11.2                                                      |
|-------------------------------------------------------------------|----------------------------------------------------------------------------------------------|------------------------------------------------|----------------------------------------------|---------------------------------------------------------------|----------------------------------------------------|--------------------------------------------------------------|
| 1MB region around top SNP                                         | chr1:2197040-7-22970407                                                                      | chr1:37596421-38596421                         | chr4:119449960-120449960                     | chr6:27980635-28980635                                        | chr9:135655000-136655000                           | chr17:28681220-29681220                                      |
| # genes in 1MB region                                             | 11                                                                                           | 22                                             | 12                                           | 23                                                            | 32                                                 | 17                                                           |
| Closest gene                                                      | <i>WNT4</i>                                                                                  | <i>RSPO1</i>                                   | <i>SYNPO2</i>                                | <i>GPX6</i>                                                   | <i>ABO</i>                                         | <i>ATAD5</i>                                                 |
| Genes with potentially deleterious mutations in TCGA ovary tumors |                                                                                              | <i>EPHA10</i>                                  |                                              | <i>GPX6, TRIM27</i>                                           | <i>TSC1, RALGDS, ABO, SURF1, C9orf96, ADAMTSL2</i> | <i>NF1</i>                                                   |
| Genes with only missense mutations in TCGA ovary tumors           | <i>RAP1GAP, USP48, HSPG2, WNT4, ZBTB40</i>                                                   | <i>ZC3H12A, DNALI1, GNL2, MTF1, INPP5B</i>     | <i>SYNPO2, USP53, FABP2</i>                  | <i>ZKSCAN4, NKAPL, ZSCAN26, PGBD1, ZSCAN31, SCAND3</i>        | <i>MED22, REXO4, ADAMTSL13, DBH, VAV2</i>          | <i>GOSR1, ATAD5, TEFM, ADAP2, OMG, EVI2B, EVI2A</i>          |
| Known genes catalogued by Sanger Cancer Gene Census               |                                                                                              |                                                |                                              | <i>TRIM27</i>                                                 | <i>TSC1, RALGDS</i>                                | <i>NF1</i>                                                   |
| Cancer genes from literature                                      | <i>WNT4, RAP1GAP, CDC42</i>                                                                  | <i>RSPO1, C1orf109, FHL3, RSPO1:</i>           | <i>SYNPO2</i>                                | <i>ZKSCAN3, TRIM27</i>                                        | <i>TSC1, ABO, RPL7A, VAV2</i>                      | <i>ATAD5, NF1</i>                                            |
| Role/tissue type gene 1                                           | <i>WNT4: inhibits cell growth in tumor cell lines</i><br><i>CDC42: migration + signaling</i> | essential malignancy + early ovary development | <i>SYNPO2: TSG</i> prostate, bladder + colon | <i>ZKSCAN3: novel 'driver' colon, cell migration</i> prostate | <i>ABO: SNP</i> association risk pancreas, ovary   | <i>ATAD5: predisposition, genetic and functional defects</i> |
| Role/tissue type gene 2                                           | ovary, migration breast                                                                      | <i>C1orf109: cancer cell proliferation</i>     |                                              | <i>TRIM27: cancer development, outcome</i> endometrial        | <i>TSC1: SNP</i> association breast                | <i>NF1: mutations</i> neurofibromatosis type 1               |
| Role/tissue type                                                  | <i>RAP1GAP: TSG</i>                                                                          | <i>FHL3:</i>                                   |                                              |                                                               | <i>RALGDS: Ras-</i>                                |                                                              |

|                                                          |                                                                  |                                                                                                    |                                                      |                                                                                                                                   |                                                                                                                |                                                                |
|----------------------------------------------------------|------------------------------------------------------------------|----------------------------------------------------------------------------------------------------|------------------------------------------------------|-----------------------------------------------------------------------------------------------------------------------------------|----------------------------------------------------------------------------------------------------------------|----------------------------------------------------------------|
| gene 3                                                   | Thyroid +<br>Pancreas                                            | downregulation<br>+<br>antiproliferative<br>breast                                                 |                                                      |                                                                                                                                   | related GTPases,<br>translocations<br>lymphoma                                                                 |                                                                |
| Role/tissue type<br>gene 4                               |                                                                  |                                                                                                    |                                                      |                                                                                                                                   | <i>RPL7A</i> : prostate +<br>breast<br><i>VAV2</i> : Vav2-<br>dependent<br>activation RhoA<br>GTPase breast    |                                                                |
| Role/tissue type<br>gene 5                               |                                                                  |                                                                                                    |                                                      |                                                                                                                                   |                                                                                                                |                                                                |
| Potentially cancer<br>related genes<br>based on function | <i>WNT4, EPHA8</i>                                               | <i>MEAF6, SNIP1,<br/>CDCA8, EPHA10</i>                                                             |                                                      |                                                                                                                                   |                                                                                                                |                                                                |
| % GAIN DNA copy<br>number                                | 21                                                               | 44                                                                                                 | 11.2                                                 | 43                                                                                                                                | 11.2                                                                                                           | 4.2                                                            |
| % LOSS DNA copy<br>number                                | 42                                                               | 14                                                                                                 | 68                                                   | 20                                                                                                                                | 59.4                                                                                                           | 83.6                                                           |
| Genes with<br>expression<br>increased in<br>tumors       |                                                                  | <i>MEAF6, SNIP1,<br/>GNL2,<br/>C1orf109,<br/>CDCA8, YRDC,<br/>INPP5B,<br/>UTP11L, <u>SF3A3</u></i> | <i>CEP170P1, SEC24D</i>                              | <i>ZNF165, ZSCAN16,<br/>ZKSCAN4, PGBD1,<br/>ZKSCAN3,<br/><u>ZSCAN9</u>,<br/><u>ZSCAN31</u>,<br/><u>ZSCAN12</u>, <u>ZNF311</u></i> | <i><u>SURF4</u>, <u>REXO4</u>,<br/><u>VAV2</u><br/>C9orf9, RALGDS,<br/>GBGT1, ABO,<br/>RPL7A, <u>TSC1</u>,</i> | <i>ATAD5</i>                                                   |
| Genes with<br>expression<br>decreased in<br>tumors       | <i><u>LDLRAD2</u>,<br/><u>CELA3A</u>,<br/><u>WNT4, EPHA8</u></i> | <i><u>DNALI1</u>, <u>RSPO1</u>,<br/><u>EPHA10</u>,<br/><u>POU3F1</u></i>                           | <i>SYNPO2, PDE5A,<br/><u>MYOZ2</u>, <u>USP53</u></i> | <i><u>NKAPL</u></i>                                                                                                               | <i><u>GFI1B</u>, <u>CEL</u>, <u>CELP</u>,<br/><u>MED22</u>, <u>SURF1</u></i>                                   | <i><u>CPD</u>, <u>NF1</u>, <u>GOSR1</u>,<br/><u>RNF135</u></i> |

Genes indicated in bold are the closest gene to the top risk SNP.

Genes underlined did not have consistent expression results on all platforms on which they were included.

**Supplementary Table 12.** TCGA tumor data and eQTL analysis in normal and tumor samples for the closest gene to each SNP

| chr region                                                      | 1p36                           | 1p34.3                                                                          | 4q26                                                      | 6p22.1                                  | 9q34.2                                                        | 17q11.2                                                                       |
|-----------------------------------------------------------------|--------------------------------|---------------------------------------------------------------------------------|-----------------------------------------------------------|-----------------------------------------|---------------------------------------------------------------|-------------------------------------------------------------------------------|
|                                                                 | chr1:21970                     | chr1:37596                                                                      | chr4:11944                                                | chr6:2798                               | chr9:1356                                                     | chr17:28681                                                                   |
| 1MB region<br>around top SNP                                    | 407-<br>22970407               | 421-<br>38596421                                                                | 9960-<br>120449960                                        | 0635-<br>28980635                       | 55000-<br>136655000                                           | 220-<br>29681220                                                              |
| # genes in 1MB<br>region                                        | 11                             | 22                                                                              | 12                                                        | 23                                      | 32                                                            | 17                                                                            |
| closest gene                                                    | <i>WNT4</i>                    | <i>RSPO1</i>                                                                    | <i>SYNPO2</i>                                             | <i>GPX6</i>                             | <i>ABO</i>                                                    | <i>ATAD5</i>                                                                  |
| # and type<br>mutations                                         | 1 missense                     | 0                                                                               | 1 missense                                                | 1<br>nonsense,<br>2<br>missense         | 1 splice                                                      | 3 missense                                                                    |
| % GAIN DNA<br>copy number                                       | 21                             | 44                                                                              | 11.2                                                      | 43                                      | 11.2                                                          | 4.2                                                                           |
| % LOSS DNA<br>copy number                                       | 42                             | 14                                                                              | 68                                                        | 20                                      | 59.4                                                          | 83.6                                                                          |
| % diploid DNA<br>copy number                                    | 37.0                           | 42.0                                                                            | 20.8                                                      | 37.0                                    | 29.4                                                          | 12.2                                                                          |
| exp increase<br>with copy #                                     | NO                             | YES amp                                                                         | NO                                                        | NO                                      | NO                                                            | YES                                                                           |
| TCGA_HT<br>Expression<br>tumor vs<br>normal and<br>p-value      | down<br>0.032                  | ND                                                                              | ND                                                        | ND                                      | down<br>2E-05                                                 | up<br>3E-06                                                                   |
| TCGA_agilent<br>Expression<br>tumor vs<br>normal and<br>p-value | down<br>0.193                  | down<br>0.341                                                                   | ND                                                        | no<br>difference<br>0.43                | down<br>0.025                                                 | up<br>3E-06                                                                   |
| TCGA_HuEx<br>Expression<br>tumor vs<br>normal and<br>p-value    | down<br>6E-05                  | down<br>0.048                                                                   | down<br>2E-06                                             | no<br>difference<br>0.13                | down<br>2E-05                                                 | up<br>3E-06                                                                   |
| summary<br>expression<br>result<br>p-value<br>significance      | down in 2<br>of 3<br>platforms | down in 1<br>of 2<br>platforms                                                  | down 1 of 1<br>platforms                                  | no<br>difference<br>2 of 2<br>platforms | down 3 of<br>3<br>platforms                                   | up 3 of 3<br>platforms                                                        |
|                                                                 | average                        | low<br>RSPO1:<br>essential<br>malignancy<br>+ early<br>ovary<br>developme<br>nt | high<br>SYNPO2:<br>TSG<br>prostate,<br>bladder +<br>colon | no<br>difference                        | high<br>ABO: SNP<br>association<br>risk<br>pancreas,<br>ovary | high<br>ATAD5:<br>predispositio<br>n, genetic<br>and<br>functional<br>defects |
| Known role in<br>cancer / tissue<br>type                        | in WNT<br>signaling<br>pathway |                                                                                 |                                                           | none                                    |                                                               |                                                                               |

|                               |           |            |          |     |          |           |
|-------------------------------|-----------|------------|----------|-----|----------|-----------|
| eQTL SNP TCGA tumors          | rs2268177 | N/A        | N/A      | N/A | rs651007 | N/A       |
| p-value TCGA 3 groups (n=339) | 0.833     | N/A        | N/A      | N/A | 0.0653   | N/A       |
| eQTL SNP in OSECs and FTSECs  | rs3820282 | rs12023270 | rs752097 |     | rs505922 | rs3764419 |
| p-value OSECs 3 groups (n=54) | 0.854     | 0.373      | 0.128    | N/A | 0.495    | 0.697     |
| p-value OSECs 2 groups (n=54) | 0.734     | 0.661      | 0.232    | N/A | 0.457    | 0.873     |
| p-value All 3 groups (n=59)   | 0.568     | N/A        | 0.0896*  | N/A | N/A      | N/A       |
| p-value All 2 groups (n=59)   | 0.666     | N/A        | 0.148    | N/A | N/A      | N/A       |

N/A indicates no expression of *GPX6* in OSECs and FTSECs or that there was a difference in expression between OSECs and FTSECs so the data was not combined.

ND indicates that there is no expression data because the gene failed quality control on that platform

\* After exclusion of outliers, p-value was 0.067.

## **Supplementary Note**

### **Imputation results**

Imputation was carried out separately for *BRCA1* carriers, *BRCA2* carriers, OCAC-iCOGS samples and the three OCAC GWAS (**Supplementary Table 1**). For the studies using the iCOGS array, 99.1-99.5% of the 6.7M common variants (MAF>0.05) from the 1000 Genomes Project were imputed with imputation accuracy of >0.30 whereas 89.3-90.4% of rare SNPs (MAF ≤0.05) had imputation accuracy of >0.30 (**Supplementary Fig. 1, Supplementary Table 2**). 67.2-67.3% of the common variants were imputed with accuracy >0.7 for the samples genotyped on iCOGS but only 18.5-21.9% of the rare variants. The GWAS studies captured 99.7-99.9% of the common variants with imputation  $r^2>0.3$  and 84.2-90.8% of the rare variants while 94.8-97.8% of the common and 44.5-58.5% of the rare SNPs had imputation accuracy >0.7 (**Supplementary Fig. 2, Supplementary Table 2**).

The genomic inflation factor  $\lambda$  for the combined meta-analysis analysis was 1.18 (adjusted value to 1000 cases and controls  $\lambda_{1000}=1.01$ , **Supplementary Fig. 3G**). After excluding known susceptibility regions, there was little evidence of significant associations with ovarian cancer beyond that expected by chance in any of the individual studies (**Supplementary Fig. 3A-F**). However, in the CIMBA-OCAC meta-analysis we saw strong evidence of significant associations. After excluding known ovarian cancer susceptibility loci, 24 SNPs from four different regions were associated at genome-wide significance ( $p<5\times 10^{-8}$ ) (**Supplementary Fig. 4, Supplementary Table 4**). Moreover, 176 SNPs from 12 different loci had p-values less than  $10^{-6}$ .

### **Associations after excluding sample overlaps between OCAC and CIMBA**

The primary analyses of the OCAC and CIMBA data were carried out independently. After completing the meta-analysis we identified 143 duplicates by comparing genotypes of *BRCA1* and *BRCA2* carriers with samples in OCAC. We then excluded these samples from OCAC and repeated the association analysis for the most strongly associated variant from each novel locus associated at genome-wide significance ( $p<5\times 10^{-8}$ ). We then repeated the combined analysis of associations in OCAC, *BRCA1* and *BRCA2* mutation carriers as described above in order to assess whether sample overlap influenced the association results. The associations were consistent with the analysis before excluding overlaps. All SNPs remained associated with ovarian cancer risk in the combined analysis for OCAC, *BRCA1* and *BRCA2* carriers with  $p<5\times 10^{-8}$ .

### **Genotyping coverage**

We also evaluated the level of coverage of common variation at each putative novel locus from our genotyping and imputation in relation to all the variants contained in the 1000 Genomes Project v3 data. Using the 1000 Genomes Project v3 we determined LD decay around the most strongly associated SNP (the lead SNP) in each region. For each region, the boundaries were set such that they contain all SNPs with  $r^2\geq 0.1$  with the lead SNP. Using pairwise tagging in Haploview<sup>1</sup> and data from the 1000 Genomes Project v3 we identified a set of LD blocks such that each SNP in the region was captured with  $r^2\geq 0.8$ . For each LD block we evaluated whether any of the SNPs were genotyped

or imputed with moderate imputation accuracy ( $0.5 < \text{imputation } r^2 \leq 0.7$ ) and high imputation accuracy (imputation  $r^2 > 0.7$ ) in the final meta-analysis results. Indels were not included.

We found that we had genotyped or imputed data covering 91% of the genetic variation in the region around the most strongly associated SNP at 1p36. For the locus at 1p34.3 the coverage was 84%, and for the locus at 4q26 the coverage was 83%. For each of these three signals we covered all common SNPs with  $\text{MAF} < 5\%$  based on the 1000 Genomes Project data. The other three novel loci had coverage of less than 80%. However, for each of the regions, all linkage disequilibrium blocks containing at least five SNPs were captured, apart from two exceptions.

### **Imputation accuracy of lead SNPs for novel loci**

The most significantly associated SNP at each of the six novel loci had high imputation accuracy ( $r^2 \geq 0.83$ ). At the 1p34.3, 1p36, and 6p22.1 loci, there was at least one genotyped SNP, correlated with the lead SNP (pairwise  $r \geq 0.73$ ), which was also associated at genome-wide significance level in the meta-analysis (**Supplementary Table 6**). At the other loci the most strongly associated genotyped SNPs displayed p-values between  $3 \times 10^{-5}$  and  $6 \times 10^{-7}$ , and their correlation to the respective lead SNP was between 0.39 and 0.86. To evaluate imputation accuracy for each of these three loci, we genotyped each lead SNP in a subset of samples using iPLEX and compared the imputed genotypes with the observed genotypes. Genotype data were available for 1,949 *BRCA1* and 1,350 *BRCA2* mutation carriers after quality control for the lead SNP, rs17329882, at 4q26. When we compared the genotypes with the dosages from the imputation, we found a coefficient of determination of  $r^2 = 0.90$ . These values were consistent with the estimated imputation accuracy of  $r^2 = 0.93$  from the imputation. SNP rs635634 at 6p22.1 was genotyped in 1,420 *BRCA1* and 1,004 *BRCA2* carriers and the genotypes were compared with the dosages from the imputation. The coefficient of determination was  $r^2 = 0.84$  which is consistent with the estimated imputation accuracy of  $r^2 = 0.83$ . The lead SNP at 17q11.2, chr17:29181220:1 failed iPLEX design.

### **Competing risks analyses in *BRCA1* and *BRCA2* mutation carriers**

We also assessed whether any of the novel ovarian cancer susceptibility loci were associated with breast cancer risk for *BRCA1* and *BRCA2* mutation carriers. The analysis was carried out within a competing risks framework by estimating the associations with breast and ovarian cancer risk simultaneously<sup>2,3</sup>. A different censoring process was used for this analysis. Individuals were followed up to the age of breast or ovarian cancer diagnosis, whichever occurred first, and were considered affected for the respective disease. Mutation carriers were censored at bilateral prophylactic mastectomy for breast and RRSO for ovarian cancer and were assumed to be unaffected for the corresponding disease. The most strongly associated genotyped SNPs at each locus were used for this purpose because the analysis software requires genotyped data.

The HR estimates for the association with ovarian cancer in the competing risks analysis were consistent with the estimates from the main analysis for all SNPs (**Supplementary Table 8**). None of the SNPs displayed associations with breast cancer risk at  $p < 0.05$ .

## **Group and Consortia Membership**

Membership lists of participating study groups

### Australian Cancer Study (ACS Investigators):

Adele C. Green, Peter G. Parsons, Nicholas K. Hayward, David M. Purdie, Penelope M. Webb, David C. Whiteman

### Australian Ovarian Cancer Study (AOCS Management Group):

D Bowtell (Peter MacCallum Cancer Centre), G Chenevix-Trench, A Green, P Webb (QIMR Berghofer), A deFazio (Westmead Institute for Cancer Research, WMI), D Gertig (Victorian Cervical Cytology Registry)

### Consortium of Investigators of Modifiers of BRCA1 and BRCA2 (CIMBA):

Alex Miron, Esther M. John, John L Hopper, Melissa Southey, Alice S. Whittemore, Mary Beth Terry, Wendy K. Chung, Mary B. Daly, David E. Goldgar, Sandra S. Buys, Ramunas Janavicius, Vilius Rudaitis, Janis Eglitis, Laima Tihomirova, Liene Nikitina-Zake, Nadine Tung, Cecilia M. Dorfling, Elizabeth J. van Rensburg, Linda Steele, Susan L. Neuhausen, Yuan Chun Ding, Anne-Marie Gerdes, Bent Ejertsen, Finn C. Nielsen, Lars Jørgensen, Mette K. Andersen, Thomas V. O. Hansen, Andrew Lee, Antonis C. Antoniou, Daniel Barrowdale, Joe Dennis, Karoline B. Kuchenbaecker, Lesley McGuffog, Sue Healey, Douglas F. Easton, Georgia Chenevix-Trench, Adam Lee, Chen Wang, Julie Cunningham, Steven Hart, Susan Slager, Adriana Lasa, Ana Osorio, Javier Benitez, Javier Godino, Maria- Isabel Tejada, Maria Jose Garcia, Mercedes Duran, Per Hall, Ed Dicks, Annette Fontaine, Ian Komenaka, Jeffrey N. Weitzel, Josef Herzog, Pamela Ganschow, Paolo Peterlongo, Brunella Pilato, Rosanna Lambo, Stefania Tommasi, Domenico Sardella, Fabio Capra, Filomena Ficarazzi, Frederique Mariette, Laura Tizzoni, Loris Bernard, Paolo Mariani, Sara Volorio, Stefano Fortuzzi, Valentina Dall'Olio, Valeria Pensotti, Alessandra Viel, Riccardo Dolcetti, Bernardo Bonanni, Irene Feroce, Monica Barile, Bernard Peissel, Daniela Zaffaroni, Elisa Cattaneo, Gaia Roversi, Giulia Melloni, Giulietta Scuvera, Paolo Radice, Siranoush Manoukian, Aline Martayan, Antonella Savarese, Liliana Varesco, Viviana Gismondi, Anna Laura Putignano, Laura Papi, Maurizio Genuardi, Maria Grazia Tibiletti, Laura Ottini, Anna Allavena, Barbara Pasini, Francesca Vignolo-Lutati, Athanassios Vratimos, Florentia Fostira, George Fountzilias, Irene Konstantopoulou, Paraskevi Apostolou, Judy Garber, Diana Torres, Muhammad Usman Rashid, Ute Hamann, Alan Donaldson, Alex Murray, Alison M. Dunning, Carol Chu, Carole Brewer, Catherine Houghton, Chris Jacobs, Clare Oliver, D. Gareth Evans, Debra Frost,



Diana Eccles, Elena Fineberg, EMBRACE (Epidemiological study of BRCA1 & BRCA2 mutation carriers :Douglas F. Easton is the PI of the study. EMBRACE Collaborating Centres are: Coordinating Centre, Cambridge:Debra Frost, Steve Ellis, Radka Platte, Jo Perkins. North of Scotland Regional Genetics Service, Aberdeen: Zosia Miedzybrodzka, Helen Gregory. Northern Ireland Regional Genetics Service, Belfast: Patrick Morrison, Lisa Jeffers. West Midlands Regional Clinical Genetics Service, Birmingham: Kai-ren Ong, Jonathan Hoffman. South West Regional Genetics Service, Bristol: Alan Donaldson, Margaret James. East Anglian Regional Genetics Service, Cambridge: Joan Paterson, Marc Tischkowitz, Sarah Downing, Amy Taylor. Medical Genetics Services for Wales, Cardiff: Alexandra Murray, Mark T. Rogers, Emma McCann. St James's Hospital, Dublin & National Centre for Medical Genetics, Dublin: M. John Kennedy, David Barton. South East of Scotland Regional Genetics Service, Edinburgh: Mary Porteous, Sarah Drummond. Peninsula Clinical Genetics Service, Exeter: Carole Brewer, Emma Kivuva, Anne Searle, Selina Goodman, Kathryn Hill. West of Scotland Regional Genetics Service, Glasgow: Rosemarie Davidson, Victoria Murday, Nicola Bradshaw, Lesley Snadden, Mark Longmuir, Catherine Watt, Sarah Gibson, Eshika Haque, Ed Tobias, Alexis Duncan. South East Thames Regional Genetics Service, Guy's Hospital London: Louise Izatt, Chris Jacobs, Caroline Langman. North West Thames Regional Genetics Service, Harrow: Huw Dorkins. Leicestershire Clinical Genetics Service, Leicester: Julian Barwell. Yorkshire Regional Genetics Service, Leeds: Julian Adlard, Gemma Serra-Feliu. Cheshire & Merseyside Clinical Genetics Service, Liverpool: Ian Ellis, Claire Foo. Manchester Regional Genetics Service, Manchester: D Gareth Evans, Fiona Laloo, Jane Taylor. North East Thames Regional Genetics Service, NE Thames, London: Lucy Side, Alison Male, Cheryl Berlin. Nottingham Centre for Medical Genetics, Nottingham: Jacqueline Eason, Rebecca Collier. Northern Clinical Genetics Service, Newcastle: Alex Henderson, Oonagh Claber, Irene Jobson. Oxford Regional Genetics Service, Oxford: Lisa Walker, Diane McLeod, Dorothy Halliday, Sarah Durell, Barbara Stayner. The Institute of Cancer Research and Royal Marsden NHS Foundation Trust: Ros Eeles, Nazneen Rahman, Elizabeth Bancroft, Elizabeth Page, Audrey Ardern-Jones, Kelly Kohut, Jennifer Wiggins, Jenny Pope, Sibel Saya, Natalie Taylor, Zoe Kemp and Angela George North Trent Clinical Genetics Service, Sheffield: Jackie Cook, Oliver Quarrell, Cathryn Bardsley. South West Thames Regional Genetics Service, London: Shirley Hodgson, Sheila Goff, Glen Brice, Lizzie Winchester, Charlotte Eddy, Vishakha Tripathi, Virginia Attard. Wessex Clinical Genetics Service, Princess Anne Hospital, Southampton: Diana Eccles, Anneke Lucassen, Gillian Crawford, Donna McBride, Sarah Smalley.), Emma McCann, Fiona Douglas, Fiona Laloo, Gabriella Ichert, Helen Gregory, Huw Dorkins, Jackie Cook, Jacqueline Eason, Jo Perkins, Joan Paterson, Julian Adlard, Julian Barwell, Kai-ren Ong, Lisa Walker, Louise Izatt, Lucy E. Side, M. John Kennedy, Margaret Cook, Mark T. Rogers, Mary E. Porteous, Patricia Harrington, Patrick J. Morrison, Radka Platte, Ros Eeles,

Rosemarie Davidson, Shirley Hodgson, Steve Ellis, Susan Peock, Trevor Cole, Andrew K. Godwin, Betsy Bove, JoEllen Weaver, Priyanka Sharma, Annette Lee, Iuliana Shapira, Ana Vega, Alexandra Becker, Alfons Meindl, Andrea Gehrig, Anne Baumgärtner, Barbara Wappenschmidt, Bernhard H. F. Weber, Christian Sutter, Christoph Engel, Dieter Niederacher, Dieter Schäfer, Doris Steinemann, Dorothea Gadzicki, Erick Hahnen, Hansjoerg Plendl, Helmut Deissler, Ina Ruehl, Karin Kast, Kerstin Rhiem, Nina Ditsch, Norbert Arnold, Raymonda Varon-Mateeva, Rita Katharina Schmutzler, Sabine Preisler-Adams, Simone Heidemann, Stefanie Engert, Wolfram Heinritz, Agnès Hardouin, Alain Calender, Antoine de Pauw, Brigitte Bressac- de Paillerets, Bruno Buecher, Capucine Delnatte, Carole Tirapo, Carole Verny-Pierre, Caroline Kientz, Catherine Nogues, Christine Lasset, Claude Houdayer, Danièle Muller, Dominique Leroux, Dominique Stoppa-Lyonnet, Etienne Rouleau, Fabienne Lesueur, Fabienne Prieur, Francesca Damiola, GEMO Study Collaborators (Genetic Modifiers of Cancer Risk in BRCA1/2 Mutation Carriers (GEMO) on behalf the National Cancer Genetics Network, UNICANCER Genetic Group, France: Coordinating Centres, Unité Mixte de Génétique Constitutionnelle des Cancers Fréquents, Hospices Civils de Lyon - Centre Léon Bérard, & Equipe «Génétique du cancer du sein», Centre de Recherche en Cancérologie de Lyon: Olga Sinilnikova (dec.), Sylvie Mazoyer, Francesca Damiola, Laure Barjhoux, Carole Verny- Pierre, Sophie Giraud, Mélanie Léone; Nadia Boutry-Kryza, and Service de Génétique Oncologique, InstitutCurie, Paris: Dominique Stoppa-Lyonnet, Marion Gauthier-Villars, Bruno Buecher, Claude Houdayer, Etienne Rouleau, Lisa Golmard, Agnès Collet, Virginie Moncoutier, Cédric Lefol, Muriel Belotti, Antoine de Pauw, Camille Elan, Catherine Nogues, Emmanuelle Fourme, Anne-Marie BirotInstitutGustave Roussy, Villejuif: Brigitte Bressac-dePaillerets, Olivier Caron, Marine Guillaud-Bataille Centre Jean Perrin,Clermont–Ferrand: Yves-Jean Bignon, Nancy Uhrhammer. Centre Léon Bérard, Lyon: Christine Lasset, Valérie Bonadona, Sandrine Handallou. Centre François Baclesse, Caen: Agnès Hardouin, Pascaline Berthet, Dominique Vaur, Laurent Castera. Institut Paoli Calmettes, Marseille: Hagay,Sobol, Violaine Bourdon, Tetsuro Noguchi, Audrey Remenieras, François Eisinger. CHU Arnaud-de-Villeneuve, Montpellier: Isabelle Coupier, Pascal Pujol, Centre Oscar Lambret, Lille: Jean-Philippe Peyrat Joëlle Fournier, Françoise Révillion, Philippe Vennin (dec.), Claude Adenis., Centre Paul Strauss, Strasbourg: Danièle Muller, Jean-Pierre Fricker. Institut Bergonié, Bordeaux: Emmanuelle Barouk-Simonet, Françoise Bonnet, Virginie Bubien, Nicolas Sevenet, Michel Longy. Institut Claudius Regaud, Toulouse: Christine Toulas, Rosine Guimbaud, Laurence Gladieff, Viviane Feillel. CHU Grenoble: Dominique Leroux, Hélène Dreyfus, Christine Rebischung, Magalie Peysse. CHU Dijon: Fanny Coron, Laurence Faivre. CHU St-Etienne: Fabienne Prieur, Marine Lebrun, Caroline Kientz. Hôtel Dieu Centre Hospitalier, Chambéry: Sandra Fert Ferrer. Centre Antoine Lacassagne, Nice: Marc Frénay. CHU Limoges: Laurence Vénat-Bouvet. CHU Nantes: Capucine Delnatte. CHU Bretonneau, Tours: Isabelle Mortemousque. Groupe

Hospitalier Pitié-Salpêtrière, Paris: Florence Coulet, Chrystelle Colas, Florent Soubrier, Mathilde Warcoin. CHU Vandoeuvre-les-Nancy: Johanna Sokolowska, Myriam Bronner. Creighton University, Omaha, USA: Henry T. Lynch, Carrie L. Snyder), Hagay Sobol, Hélène Dreyfus, Isabelle Coupier, Jean-Philippe Peyrat, Jean-Pierre Fricker, Johanna Sokolowska, Laure Barjhoux, Laurence Faivre, Laurence Venat-Bouvet, Laurent Castera, Linda Akloul, Lisa Golmard, Marc Frenay, Marie-Agnès Collonge-Rame, Marie-Alice Remon, Marine Lebrun, Marion Fassy-Colcombet, Marion Gauthier-Villars, Mélanie Léoné, Michel Longy, Muriel Belotti, Myriam Bronner, Nadia Boutry-Kryza, Nancy Uhrhammer, Nicolas Sevenet, Olga M. Sinilnikova (dec.), Olivier Caron, Pascal Pujol, Pascaline Berthet, Sandra Fert Ferrer, Sophie Giraud, Sylvie Mazoyer, Valérie Bonadona, Virginie Caux-Moncoutier, Yves-Jean Bignon, Claudine Isaacs, Anne De Paepe, Bruce Poppe, Kathleen Claes, Kim De Leeneer, David E. Cohn, David M. O'Malley, Gustavo C. Rodriguez, Jack B. Basil, James S. Hoffman, James V. Fiorica, Jean A. Hurteau, John F. Boggess, John W. Byron, Jonathan Carter, Judy Kirk, Katie Wakeley, Kelly-Anne Phillips, Laurie Small, Lesley Andrews, Leslie R. DeMars, Linda Van Le, Marion Piedmonte, Masoud Azodi, Michael Friedlander, Paul A. DiSilvestro, Peter E. Schwartz, Ritu Salani, Stacy R. Nerenstone, Stephanie V. Blank, Victoria L. Bae-Jump, Atocha Romero, Miguel de la Hoya, Pedro Perez Segura, Trinidad Caldes, Heli Nevanlinna, Kristiina Aittomäki, Sofia Khan, Taru A. Muranen, Agnes Jager, Annemarie H. van der Hout, Ans M.W. van den Ouweland, Antoinette Hollestelle, Arjen R. Mensenkamp, Carolien H.M. van Deurzen, Carolien M. Kets, Caroline Seynaeve, Christi J. van Asperen, Cora M. Aalfs, Encarna B. Gómez Garcia, Flora E. van Leeuwen, Frans B.L. Hogervorst, Frederieke H. van der Baan, Hanne E.J. Meijers-Heijboer, Hans F.A. Vasen, HEBON (The Hereditary Breast and Ovarian Cancer Research Group Netherlands consists of the following Collaborating Centers: Coordinating center: Netherlands Cancer Institute, Amsterdam, NL: M.A. Rookus, F.B.L. Hogervorst, F.E. van Leeuwen, S. Verhoef, M.K. Schmidt, N.S. Russell, J.L. de Lange, R. Wijnands; Erasmus Medical Center, Rotterdam, NL: J.M. Collée, A.M.W. van den Ouweland, M.J. Hooning, C. Seynaeve, C.H.M. van Deurzen, I.M. Obdeijn; Leiden University Medical Center, NL: C.J. van Asperen, J.T. Wijnen, R.A.E.M. Tollenaar, P. Devilee, T.C.T.E.F. van Cronenburg; Radboud University Nijmegen Medical Center, NL: C.M. Kets, A.R. Mensenkamp; University Medical Center Utrecht, NL: M.G.E.M. Ausems, R.B. van der Luijt, C.C. van der Pol; Amsterdam Medical Center, NL: C.M. Aalfs, T.A.M. van Os; VU University Medical Center, Amsterdam, NL: J.J.P. Gille, Q. Waisfisz, H.E.J. Meijers-Heijboer; University Hospital Maastricht, NL: E.B. Gómez-Garcia, M.J. Blok; University Medical Center Groningen, NL: J.C. Oosterwijk, A.H. van der Hout, M.J. Mourits, G.H. de Bock; The Netherlands Foundation for the detection of hereditary tumors, Leiden, NL: H.F. Vasen; The Netherlands Comprehensive Cancer Organization (IKNL): S. Siesling, J. Verloop; The Dutch Pathology Registry (PALGA): L.I.H. Overbeek.), Irma Kluijt, J. Margriet Collée, J.J.P. Gille, Jacoba P. Knol-Bout,

Jan C. Oosterwijk, Juul T. Wijnen, K.E.P. van Roozendaal, Lieske H. Schrijver, Maartje J. Hooning, Madeleine A. Tilanus-Linthorst, Margreet G.E.M. Ausems, Marie-José Blom, Marieke F. van Dooren, Marinus J. Blok, Marjolijn J.L. Ligtenberg, Matti A. Rookus, Mieke Kriege, Nicoline Hoogerbrugge, Peter Devilee, Quinten Waisfisz, Rob B. van der Luijt, Senno Verhoef, Theo A.M. van Os, Ava Kwong, Edmund Ma, TL Chan, Edith Olah, Janos Papp, Tibor Vaszko, Timea Pocza, Judith Balmaña, Nina Bosch, Orland Diez , Alex Teulé, Angel Izquierdo, Angela Velasco, Ares Solanes, Conxi Lazaro, Esther Darder, Eva Tornero, Gabriel Capella, Ignacio Blanco, Jesús Del Valle, Joan Brunet, Lidia Feliubadalo, Matilde Navarro, Miquel Angel Pujana, Mireia Menendez, Mónica Salinas, Silvia Iglesias, Aleksandra Toloczko-Grabarek, Anna Jakubowska, Bohdan Górski , Cezary Cybulski, Elżbieta Złowocka-Perłowska, Grzegorz Sukiennicki, Jacek Gronwald, Jan Lubinski, Janusz Menkiszak, Katarzyna Durda , Katarzyna Jaworska-Bieniek, Tadeusz Dębniak , Tomasz Byrski, Tomasz Huzarski, Adalgeir Arason, Bjarni A. Agnarsson, Oskar Th. Johannsson, Rosa B. Barkardottir, Bernard Lespérance, Christine Maugard, Jocelyne Chiquette, Marie Plante, Martine Dumont, Rachel Laframboise, Jacques Simard, Penny Soucy, Cinzia Casella , Elisa Alducci, Emma D'Andrea, Marco Montagna, Silvia Tognazzo, Simona Agata, Ana Peixoto, Manuel R. Teixeira, Amanda B. Spurdle, Helene Holland, Jonathan Beesley, KConFab Investigators (Kathleen Cuninghame Foundation Consortium for research into Familial Breast cancer : Morteza Aghmesheh, David Amor, Lesley Andrews, Yoland Antill, Shane Armitage, Leanne Arnold, Rosemary Balleine, Agnes Bankier, Patti Bastick, Jonathan Beesley, John Beilby, Barbara Bennett, Ian Bennett, Geoffrey Berry, Anneke Blackburn, Michael Bogwitz , Meagan Brennan, Melissa Brown, Michael Buckley, Matthew Burgess , Jo Burke, Phyllis Butow, Keith Byron, David Callen, Ian Campbell, Deepa Chauhan, Manisha Chauhan, Georgia Chenevix-Trench, Alice Christian, Christine Clarke, Alison Colley, Dick Cotton, Ashley Crook, James Cui, Bronwyn Culling, Margaret Cummings, Sarah-Jane Dawson, Anna deFazio, Martin Delatycki, Rebecca Dickson, Joanne Dixon, Alexander Dobrovic, Tracy Dudding, Ted Edkins, Stacey Edwards, Maurice Eisenbruch, Gelareh Farshid, Susan Fawcett, Andrew Fellows, Georgina Fenton, Michael Field, Frank Firgaira, James Flanagan, Jean Fleming, Peter Fong, John Forbes, Stephen Fox, Juliet French, Michael Friedlander, Clara Gaff, Mac Gardner, Mike Gattas, Peter George, Graham Giles, Grantley Gill, Jack Goldblatt, Sian Greening, Scott Grist, Eric Haan, Kate Hardie, Marion Harris, Stewart Hart, Nick Hayward, Sue Healey, Louise Heiniger, John Hopper, Evelyn Humphrey, Clare Hunt, Paul James, Mark Jenkins, Alison Jones, Rick Kefford, Alexa Kidd, Belinda Kiely, Judy Kirk, Jessica Koehler, James Kollias, Serguei Kovalenko, Sunil Lakhani, Amanda Leaming, Jennifer Leary, Jacqueline Lim, Geoff Lindeman, Lara Lipton, Liz Lobb, Graham Mann, Deborah Marsh, Sue Anne McLachlan, Bettina Meiser, Cliff Meldrum, Roger Milne, Gillian Mitchell, Beth Newman, Eveline Niedermayr, Sophie Nightingale, Shona O'Connell, Imelda O'Loughlin, Richard Osborne, Nick Pachter, Briony Patterson, Lester Peters, Kelly Phillips,

Melanie Price, Lynne Purser, Tony Reeve, Jeanne Reeve, Robert Richards, Edwina Rickard, Bridget Robinson Barney Rudzki, Mona Saleh, Elizabeth Salisbury, Joe Sambrook, Christobel Saunders, Jodi Saunus, Robyn Sayer, Elizabeth Scott, Rodney Scott, Clare Scott, Ram Seshadri, Adrienne Sexton, Raghwa Sharma, Andrew Shelling, Peter Simpson, Melissa Southey, Amanda Spurdle, Graeme Suthers, Pamela Sykes, Margaret Tassell, Donna Taylor, Jessica Taylor, Benjamin Thierry, Susan Thomas, Ella Thompson, Heather Thorne, Sharron Townshend, Alison Trainer, Lan Tran, Kathy Tucker, Janet Tyler Jane Visvader, Logan Walker, Ian Walpole, Robin Ward, Paul Waring, Bev Warner, Graham Warren, Rachael Williams, Judy Wilson, Ingrid Winship, Kathy Wu, Mary Ann Young), Xiaoqing Chen, Jong Won Lee, Min Hyuk Lee, Sue K. Park, Sung-Won Kim, Tara Friebel, Curtis Olsword, Kristen Stevens, Matthew Kosel, Noralane Lindor, Vernon S. Pankratz, Xianshu Wang, Zachary Fredericksen, Fergus J. Couch, Marc Tischkowitz, William D. Foulkes, Csilla I. Szabo, Eva Machackova, Lenka Foretova, Michal Zikan, Petr Pohlreich, Zdenek Kleibl, Zohra Ali-Kahn Catts, Anna Dutra-Clarke, Carol A Aghajanian, Jennifer Przybylo, Joseph Vijai, Kara Sarrel, Kenneth Offit, Marina Corines, Mark Robson, Mia M. Gaudet, Noah Kauff, Sohela Shah, Tomas Kirchhoff, Andreas Berger, Anneliese Fink-Retter, Christian F. Singer, Christine Rappaport, Daphne Geschwantler Kaulich, Georg Pfeiler, Muy-Kheng Tea, Catherine M. Phelan, Steven A. Narod, Mark H. Greene, Phuong L. Mai, Sharon A. Savage, Jennifer T. Loud, Mark E. Sherman , Flavio Lejbkowicz, Gad Rennert, Anna P. Sokolenko, Evgeny N. Imyanitov, Christina Selkirk, Peter Hulick, Anna Marie Mulligan, Gord Glendon, Hilmi Ozcelik (dec.), Irene L. Andrulis, Sandrine Tchatchou, Amanda Ewart Toland, Leigha Senter, Anders Bojesen, Anne-Bine Skytte, Inge Sokilde Pedersen, Lone Sunde, Mads Thomassen, Sanne Traasdahl Moeller, Signe Væth, Torben A. Kruse, Uffe Birk Jensen, Anita Collavoli, Maria A. Caligo, Mariella Tancredi, Paolo Aretini, Soo-Hwang Teo, Bella Kaufman, Eitan Friedman, Jamal Zidan , Raanan Berger, Yael Laitman , Ake Borg, Anna Öfverholm, Anna von Wachenfeldt, Annelie Liljegren, Annika Lindblom, Beatrice Melin, Brita Arver, Christina Edwinsdotter Ardnor, Gisela Barbany Bustinza , Håkan Olsson, Hans Ehrencrona, Helena Jernström, Johanna Rantala, Karin Henriksson, Katja Harbst, Margareta Nordling, Maria Soller, Marie Stenmark-Askmal, Maritta Hellström Pigg, Monica Emanuelsson, Niklas Loman, Per Karlsson, Richard Rosenquist, Sigrun Liedgren, Ulf Kristoffersson, Zakaria Einbeigi, Dezheng Huo, Dominique Sighoko, Jing Zhang, Linda Patrick-Miller, Marion Verp, Olufunmilayo I. Olopade, Sarah Nielsen, Yonglan Zheng, Joyce Seldon, Patricia A. Ganz, Robert L. Nussbaum, Salina B. Chan, Kirsten B. Moysich, Kunle Odunsi, Lara Sucheston, Paul D.P. Pharoah, Simon A. Gayther, Susan J. Ramus, Katherine L. Nathanson, Susan M. Domchek, Timothy R. Rebbeck, Banu K. Arun, Karen H. Lu, Gillian Mitchell, Ian Campbell, Paul James, Beth Y. Karlan, Christine Walsh, Jenny Lester, Sandra Orsulic.

Epidemiological study of BRCA1 & BRCA2 mutation carriers (EMBRACE):

Douglas F. Easton is the PI of the study. EMBRACE Collaborating Centres are: Coordinating Centre, Cambridge: Debra Frost, Steve Ellis, Radka Platte, Jo Perkins. North of Scotland Regional Genetics Service, Aberdeen: Zosia Miedzybrodzka, Helen Gregory. Northern Ireland Regional Genetics Service, Belfast: Patrick Morrison, Lisa Jeffers. West Midlands Regional Clinical Genetics Service, Birmingham: Kai-ren Ong, Jonathan Hoffman. South West Regional Genetics Service, Bristol: Alan Donaldson, Margaret James. East Anglian Regional Genetics Service, Cambridge: Joan Paterson, Marc Tischkowitz, Sarah Downing, Amy Taylor. Medical Genetics Services for Wales, Cardiff: Alexandra Murray, Mark T. Rogers, Emma McCann. St James's Hospital, Dublin & National Centre for Medical Genetics, Dublin: M. John Kennedy, David Barton. South East of Scotland Regional Genetics Service, Edinburgh: Mary Porteous, Sarah Drummond. Peninsula Clinical Genetics Service, Exeter: Carole Brewer, Emma Kivuva, Anne Searle, Selina Goodman, Kathryn Hill. West of Scotland Regional Genetics Service, Glasgow: Rosemarie Davidson, Victoria Murday, Nicola Bradshaw, Lesley Snadden, Mark Longmuir, Catherine Watt, Sarah Gibson, Eshika Haque, Ed Tobias, Alexis Duncan. South East Thames Regional Genetics Service, Guy's Hospital London: Louise Izatt, Chris Jacobs, Caroline Langman. North West Thames Regional Genetics Service, Harrow: Huw Dorkins. Leicestershire Clinical Genetics Service, Leicester: Julian Barwell. Yorkshire Regional Genetics Service, Leeds: Julian Adlard, Gemma Serra-Feliu. Cheshire & Merseyside Clinical Genetics Service, Liverpool: Ian Ellis, Claire Foo. Manchester Regional Genetics Service, Manchester: D Gareth Evans, Fiona Laloo, Jane Taylor. North East Thames Regional Genetics Service, NE Thames, London: Lucy Side, Alison Male, Cheryl Berlin. Nottingham Centre for Medical Genetics, Nottingham: Jacqueline Eason, Rebecca Collier. Northern Clinical Genetics Service, Newcastle: Alex Henderson, Oonagh Claber, Irene Jobson. Oxford Regional Genetics Service, Oxford: Lisa Walker, Diane McLeod, Dorothy Halliday, Sarah Durell, Barbara Stayner. The Institute of Cancer Research and Royal Marsden NHS Foundation Trust: Ros Eeles, Nazneen Rahman, Elizabeth Bancroft, Elizabeth Page, Audrey Ardern-Jones, Kelly Kohut, Jennifer Wiggins, Jenny Pope, Sibel Saya, Natalie Taylor, Zoe Kemp and Angela George North Trent Clinical Genetics Service, Sheffield: Jackie Cook, Oliver Quarrell, Cathryn Bardsley. South West Thames Regional Genetics Service, London: Shirley Hodgson, Sheila Goff, Glen Brice, Lizzie Winchester, Charlotte Eddy, Vishakha Tripathi, Virginia Attard. Wessex Clinical Genetics Service, Princess Anne Hospital, Southampton: Diana Eccles, Anneke Lucassen, Gillian Crawford, Donna McBride, Sarah Smalley.

Genetic Modifiers of Cancer Risk in BRCA1/2 Mutation Carriers (GEMO) on behalf the National Cancer Genetics Network, UNICANCER Genetic Group, France:

GEMO Collaborating Centers are: Coordinating Centres, Unité Mixte de Génétique Constitutionnelle des Cancers Fréquents, Hospices Civils de Lyon - Centre Léon Bérard, & Equipe «Génétique du cancer du sein», Centre de Recherche en Cancérologie de Lyon: Olga Sinilnikova (dec.), Sylvie Mazoyer, Francesca Damiola, Laure Barjhoux, Carole Verny- Pierre, Sophie Giraud, Mélanie Léone; Nadia Boutry-Kryza, and Service de Génétique Oncologique, InstitutCurie, Paris: Dominique Stoppa-Lyonnet, Marion Gauthier-Villars, Bruno Buecher, Claude Houdayer, Etienne Rouleau, Lisa Golmard, Agnès Collet, Virginie Moncoutier, Cédric Lefol, Muriel Belotti, Antoine de Pauw, Camille Elan, Catherine Nogues, Emmanuelle Fourme, Anne-Marie BirotInstitutGustave Roussy, Villejuif: Brigitte Bressac-dePaillerets, Olivier Caron, Marine Guillaud-Bataille Centre Jean Perrin,Clermont–Ferrand: Yves-Jean Bignon, Nancy Uhrhammer. Centre Léon Bérard, Lyon: Christine Lasset, Valérie Bonadona, Sandrine Handallou. Centre François Baclesse, Caen: Agnès Hardouin, Pascaline Berthet, Dominique Vaur, Laurent Castera. Institut Paoli Calmettes, Marseille: Hagay,Sobol, Violaine Bourdon, Tetsuro Noguchi, Audrey Remenieras, François Eisinger. CHU Arnaud-de-Villeneuve, Montpellier: Isabelle Coupier, Pascal Pujol, Centre Oscar Lambret, Lille: Jean-Philippe Peyrat Joëlle Fournier, Françoise Révillion, Philippe Vennin (dec.), Claude Adenis., Centre Paul Strauss, Strasbourg: Danièle Muller, Jean-Pierre Fricker. Institut Bergonié, Bordeaux: Emmanuelle Barouk-Simonet, Françoise Bonnet, Virginie Bubien, Nicolas Sevenet, Michel Longy. Institut Claudius Regaud, Toulouse: Christine Toulas, Rosine Guimbaud, Laurence Gladiéff, Viviane Feillel. CHU Grenoble: Dominique Leroux, Hélène Dreyfus, Christine Rebischung, Magalie Peysselon. CHU Dijon: Fanny Coron, Laurence Faivre. CHU St-Etienne: Fabienne Prieur, Marine Lebrun, Caroline Kientz. Hôtel Dieu Centre Hospitalier, Chambéry: Sandra Fert Ferrer. Centre Antoine Lacassagne, Nice: Marc Frénay. CHU Limoges: Laurence Vénat-Bouvet. CHU Nantes: Capucine Delnatte. CHU Bretonneau, Tours: Isabelle Mortemousque. Groupe Hospitalier Pitié-Salpêtrière, Paris: Florence Coulet, Chrystelle Colas, Florent Soubrier, Mathilde Warcoin. CHU Vandoeuvre-les-Nancy: Johanna Sokolowska, Myriam Bronner. Creighton University, Omaha, USA: Henry T.Lynch, Carrie L.Snyder.

The Hereditary Breast and Ovarian Cancer Research Group Netherlands (HEBON):

HEBON consists of the following Collaborating Centers: Coordinating center: Netherlands Cancer Institute, Amsterdam, NL: M.A. Rookus, F.B.L. Hogervorst, F.E. van Leeuwen, S. Verhoef, M.K. Schmidt, N.S. Russell, J.L. de Lange, R. Wijnands; Erasmus Medical Center, Rotterdam, NL: J.M. Collée, A.M.W. van den Ouweland, M.J. Hooning, C. Seynaeve, C.H.M. van Deurzen, I.M. Obdeijn; Leiden University Medical Center, NL: C.J. van Asperen, J.T. Wijnen, R.A.E.M. Tollenaar, P. Devilee, T.C.T.E.F. van Cronenburg; Radboud University Nijmegen Medical Center, NL: C.M. Kets, A.R. Mensenkamp; University Medical Center Utrecht, NL: M.G.E.M. Ausems, R.B. van der Luijt, C.C. van

der Pol; Amsterdam Medical Center, NL: C.M. Aalfs, T.A.M. van Os; VU University Medical Center, Amsterdam, NL: J.J.P. Gille, Q. Waisfisz, H.E.J. Meijers-Heijboer; University Hospital Maastricht, NL: E.B. Gómez-García, M.J. Blok; University Medical Center Groningen, NL: J.C. Oosterwijk, A.H. van der Hout, M.J. Mourits, G.H. de Bock; The Netherlands Foundation for the detection of hereditary tumors, Leiden, NL: H.F. Vasen; The Netherlands Comprehensive Cancer Organization (IKNL): S. Siesling, J.Verloop; The Dutch Pathology Registry (PALGA): L.I.H. Overbeek.

Kathleen Cuningham Foundation Consortium for research into Familial Breast cancer (kConFab):

Morteza Aghmesheh, David Amor, Lesley Andrews, Yolanda Antill, Shane Armitage, Leanne Arnold, Rosemary Balleine, Agnes Bankier, Patti Bastick, Jonathan Beesley, John Beilby, Barbara Bennett, Ian Bennett, Geoffrey Berry, Anneke Blackburn, Michael Bogwitz, Meagan Brennan, Melissa Brown, Michael Buckley, Matthew Burgess, Jo Burke, Phyllis Butow, Keith Byron, David Callen, Ian Campbell, Deepa Chauhan, Manisha Chauhan, Georgia Chenevix-Trench, Alice Christian, Christine Clarke, Alison Colley, Dick Cotton, Ashley Crook, James Cui, Bronwyn Culling, Margaret Cummings, Sarah-Jane Dawson, Anna deFazio, Martin Delatycki, Rebecca Dickson, Joanne Dixon, Alexander Dobrovic, Tracy Dudding, Ted Edkins, Stacey Edwards, Maurice Eisenbruch, Gelareh Farshid, Susan Fawcett, Andrew Fellows, Georgina Fenton, Michael Field, Frank Firgaira, James Flanagan, Jean Fleming, Peter Fong, John Forbes, Stephen Fox, Juliet French, Michael Friedlander, Clara Gaff, Mac Gardner, Mike Gattas, Peter George, Graham Giles, Grantley Gill, Jack Goldblatt, Sian Greening, Scott Grist, Eric Haan, Kate Hardie, Marion Harris, Stewart Hart, Nick Hayward, Sue Healey, Louise Heiniger, John Hopper, Evelyn Humphrey, Clare Hunt, Paul James, Mark Jenkins, Alison Jones, Rick Kefford, Alexa Kidd, Belinda Kiely, Judy Kirk, Jessica Koehler, James Kollias, Serguei Kovalenko, Sunil Lakhani, Amanda Leaming, Jennifer Leary, Jacqueline Lim, Geoff Lindeman, Lara Lipton, Liz Lobb, Graham Mann, Deborah Marsh, Sue Anne McLachlan, Bettina Meiser, Cliff Meldrum, Roger Milne, Gillian Mitchell, Beth Newman, Eveline Niedermayr, Sophie Nightingale, Shona O'Connell, Imelda O'Loughlin, Richard Osborne, Nick Pachter, Briony Patterson, Lester Peters, Kelly Phillips, Melanie Price, Lynne Purser, Tony Reeve, Jeanne Reeve, Robert Richards, Edwina Rickard, Bridget Robinson Barney Rudzki, Mona Saleh, Elizabeth Salisbury, Joe Sambrook, Christobel Saunders, Jodi Saunus, Robyn Sayer, Elizabeth Scott, Rodney Scott, Clare Scott, Ram Seshadri, Adrienne Sexton, Raghwa Sharma, Andrew Shelling, Peter Simpson, Melissa Southey, Amanda Spurdle, Graeme Suthers, Pamela Sykes, Margaret Tassell, Donna Taylor, Jessica Taylor, Benjamin Thierry, Susan Thomas, Ella Thompson, Heather Thorne, Sharron Townshend, Alison Trainer, Lan Tran, Kathy Tucker, Janet Tyler Jane Visvader, Logan Walker, Ian Walpole, Robin Ward, Paul Waring, Bev Warner, Graham Warren, Rachael Williams, Judy Wilson, Ingrid Winship, Kathy Wu, Mary Ann Young



## **Acknowledgements**

### **Higher level funding**

#### COGS

The COGS project is funded through a European Commission's Seventh Framework Programme grant (agreement number 223175 - HEALTH-F2-2009-223175).

#### OCAC

The Ovarian Cancer Association Consortium is supported by a grant from the Ovarian Cancer Research Fund thanks to donations by the family and friends of Kathryn Sladek Smith (PPD/RPCI.07). The scientific development and funding for this project were in part supported by the US National Cancer Institute GAME-ON Post-GWAS Initiative (U19-CA148112).

#### CIMBA

The CIMBA data management and data analysis were supported by Cancer Research – UK grants C12292/A11174 and C1287/A10118. SH is supported by an NHMRC Program Grant to GCT.

### **Individuals**

#### COGS

This study would not have been possible without the contributions of the following: Per Hall (COGS); Kyriaki Michailidou, Manjeet K. Bolla, Qin Wang (BCAC); Rosalind A. Eeles, Ali Amin Al Olama, Zsofia Kote-Jarai, Sara Benlloch (PRACTICAL); Alison M. Dunning, Craig Luccarini, Michael Lush and the staff of the Centre for Cancer Genetic Epidemiology; Simard and Daniel C. Tessier, Francois Bacot, Daniel Vincent, Sylvie LaBoissière and Frederic Robidoux and the staff of the McGill University and Génome Québec Innovation Centre; and Julie M. Cunningham, Sharon A. Windebank, Christopher A. Hilker, Jeffrey Meyer and the staff of Mayo Clinic Genotyping Core Facility;

#### OCAC

D. C. Whiteman, P. M. Webb, A. C. Green, N. K. Hayward, P. G. Parsons, D. M. Purdie, B. M. Smithers, D. Gotley, A. Clouston, I. Brown, S. Moore, K. Harrap, T. Sadkowski, S. O'Brien, E. Minehan, D. Roffe, S. O'Keefe, S. Lipshut, G. Connor, H. Berry, F. Walker, T. Barnes, J. Thomas, L. Terry, M. Connard, L. Bowes, M-R. Malt, J. White, C. Mosse, N. Tait, C. Bambach, A. Biankan, R. Brancatisano, M. Coleman, M. Cox, S. Deane, G. L. Falk, J. Gallagher, M. Hollands, T. Hugh, D. Hunt, J. Jorgensen, C. Martin, M. Richardson, G. Smith, R. Smith, D.

Storey , J. Avramovic , J. Croese, J. D'Arcy , S. Fairley, J. Hansen , J. Masson, L. Nathanson , B. O'Loughlin , L. Rutherford , R. Turner , M. Windsor , J. Bessell, P. Devitt , G. Jamieson , D. Watson, S. Blamey , A. Boussioutas, R. Cade , G. Crosthwaite , I. Faragher , J. Gribbin, G. Hebbard, G. Kiroff , B. Mann , R. Millar , P. O'Brien , R. Thomas , S. Wood , S. Archer , K. Faulkner, J. Hamdorf (ACS); R. Stuart-Harris, F. Kirsten, J. Rutovitz, P. Clingan, A. Glasgow, A. Proietto, S. Braye, G. Otton, J. Shannon, T. Bonaventura, J. Stewart, S. Begbie, M. Friedlander, D. Bell, S. Baron-Hay, G. Gard, D. Nevell, N. Pavlakis, S. Valmadre, B. Young, C Camaris, R. Crouch, L. Edwards, N. Hacker, D. Marsden, G. Robertson, P. Beale, J. Beith, J. Carter, C. Dalrymple, R. Houghton, P. Russell, L. Anderson, M. Links, J. Grygiel, J. Hill, A. Brand, K. Byth, R. Jaworski, P. Harnett, R. Sharma, .G Wain, D. Purdie, D. Whiteman, B. Ward, D. Papadimos, A. Crandon, M. Cummings, K. Horwood. A. Obermair, L. Perrin, D. Wyld, J. Nicklin, M. Davy, M. K. Oehler, C. Hall, T. Dodd, T. Healy, K. Pittman, D. Henderson, J. Miller, J. Pierdes, A. Achan, P. Blomfield, D. Challis, R. McIntosh, A. Parker, B. Brown, R. Rome, D. Allen, P. Grant, S. Hyde, R. Laurie, M. Robbie, D. Healy, T. Jobling, T. Manolitsas, J. McNealage, P Rogers, B. Susil, E. Sumithran, I. Simpson, I. Haviv, K. Phillips, D. Rischin, S. Fox, D. Johnson, S. Lade, P. Waring, M. Loughrey, N .O'Callaghan, B. Murray, L. Mileshekin, P. Allan; V. Billson, J. Pyman, D. Neesham, M. Quinn, A. Hamilton, C. Underhill, R. Bell, L. F Ng, R. Blum, V., Ganju, I. Hammond, C. Stewart, Y. Leung, M. Buck, N. Zeps (ACS); G. Peuteman, T. Van Brussel and D. Smeets (BEL); U. Eilber and T. Koehler (GER); L. Gacucova (HMO); P. Schürmann, F. Kramer, W. Zheng, T.-W. Park-Simon, K. Beer-Grondke and D. Schmidt (HJO); G.S. Keeney, S. Windebank, C. Hilker and J. Vollenweider (MAY); the state cancer registries of AL, AZ, AR, CA, CO, CT, DE, FL, GA, HI, ID, IL, IN, IA, KY, LA, ME, MD, MA, MI, NE, NH, NJ, NY, NC, ND, OH, OK, OR, PA, RI, SC, TN, TX, VA, WA, and WYL (NHS); L. Paddock, M. King, U. Chandran, A. Samoila, and Y. Bensman (NJO); L. Brinton, M. Sherman, A. Hutchinson, N. Szeszenia- Dabrowska, B. Peplonska, W. Zatonski, A. Soni, P. Chao and M. Stagner (POL); ); C. Luccarini, P. Harrington the SEARCH team and ECRIC (SEA); the Scottish Gynaecological Clinical Trails group and SCOTROC1 investigators (SRO); W-H. Chow, Y-T. Gao (SWH); Information about TCGA and the investigators and institutions who constitute the TCGA research network can be found at [http://cancergenome.nih.gov/ \(TCGA\)](http://cancergenome.nih.gov/ (TCGA)); I. Jacobs, M. Widschwendter, E. Wozniak, N. Balogun, A. Ryan and J. Ford (UKO); Carole Pye (UKR); a full list of the investigators who contributed to the generation of the WTCCC data is available from <http://www.wtccc.org.uk/> (WTCCC); Ronnie Drapkin and Alison Kast for providing fallopian tube secretory epithelial cell lines.

#### CIMBA

Maggie Angelakos, Judi Maskiell, Gillian Dite, Helen Tsimiklis; members and participants in the New York site of the Breast Cancer Family Registry; members and participants in the Ontario Familial Breast Cancer Registry for their contributions to the study; Vilius Rudaitis, Laimonas Griškevičius, Drs Janis Eglitis, Anna Krilova and Aivars Stengrevics; the families who contribute to the BMBSA study; Chun Ding, Linda Steele; Alicia Barroso, Rosario Alonso, Guillermo Pita, Daniela Zaffaroni and Giulietta Scuvera of the Fondazione IRCCS Istituto Nazionale Tumori (INT), Milan, Italy; Monica Barile and Irene Feroce of the Istituto Europeo di Oncologia, Milan , Italy; Gabriele Capone of the University of Florence, Florence, Italy; Riccardo Dolcetti of the CRO Aviano National Cancer Institute, Aviano (PN), Italy; Laura Ottini of the Sapienza University, Rome, Italy; Liliana Varesco of the IRCCS AOU San Martino - IST Istituto Nazionale per la Ricerca sul Cancro, Genoa; Maria Grazia Tibiletti of the

Ospedale di Circolo-Università dell'Insubria, Varese, Italy; Antonella Savarese and Aline Martayan of the Istituto Nazionale Tumori Regina Elena, Rome, Italy; Stefania Tommasi and Brunella Pilato of the Istituto Nazionale Tumori "Giovanni Paolo II", Bari, Italy; and the personnel of the Cogentech Cancer Genetic Test Laboratory, Milan, Italy, EMBRACE Collaborating Centres are: Coordinating Centre, Cambridge: Debra Frost, Steve Ellis, Elena Fineberg, Radka Platte. North of Scotland Regional Genetics Service, Aberdeen: Zosia Miedzybrodzka, Helen Gregory. Northern Ireland Regional Genetics Service, Belfast: Patrick Morrison, Lisa Jeffers. West Midlands Regional Clinical Genetics Service, Birmingham: Trevor Cole, Kai-ren Ong, Jonathan Hoffman. South West Regional Genetics Service, Bristol: Alan Donaldson, Margaret James. East Anglian Regional Genetics Service, Cambridge: Marc Tischkowitz, Joan Paterson, Amy Taylor. Medical Genetics Services for Wales, Cardiff: Alexandra Murray, Mark T. Rogers, Emma McCann. St James's Hospital, Dublin & National Centre for Medical Genetics, Dublin: M. John Kennedy, David Barton. South East of Scotland Regional Genetics Service, Edinburgh: Mary Porteous, Sarah Drummond. Peninsula Clinical Genetics Service, Exeter: Carole Brewer, Emma Kivuva, Anne Searle, Selina Goodman, Kathryn Hill. West of Scotland Regional Genetics Service, Glasgow: Rosemarie Davidson, Victoria Murday, Nicola Bradshaw, Lesley Snadden, Mark Longmuir, Catherine Watt, Sarah Gibson, Eshika Haque, Ed Tobias, Alexis Duncan. South East Thames Regional Genetics Service, Guy's Hospital London: Louise Izatt, Chris Jacobs, Caroline Langman. North West Thames Regional Genetics Service, Harrow: Huw Dorkins. Leicestershire Clinical Genetics Service, Leicester: Julian Barwell. Yorkshire Regional Genetics Service, Leeds: Julian Adlard, Gemma Serra-Feliu. Cheshire & Merseyside Clinical Genetics Service, Liverpool: Ian Ellis, Catherine Houghton. Manchester Regional Genetics Service, Manchester: D Gareth Evans, Fiona Laloo, Jane Taylor. North East Thames Regional Genetics Service, NE Thames, London: Lucy Side, Alison Male, Cheryl Berlin. Nottingham Centre for Medical Genetics, Nottingham: Jacqueline Eason, Rebecca Collier. Northern Clinical Genetics Service, Newcastle: Fiona Douglas, Oonagh Claber, Irene Jobson. Oxford Regional Genetics Service, Oxford: Lisa Walker, Diane McLeod, Dorothy Halliday, Sarah Durell, Barbara Stayner. The Institute of Cancer Research and Royal Marsden NHS Foundation Trust: Ros Eeles, Susan Shanley, Nazneen Rahman, Richard Houlston, Elizabeth Bancroft, Elizabeth Page, Audrey Arden-Jones, Kelly Kohut, Jennifer Wiggins, Elena Castro, Emma Killick, Sue Martin, Gillian Rea, Anjana Kulkarni. North Trent Clinical Genetics Service, Sheffield: Jackie Cook, Oliver Quarrell, Cathryn Bardsley. South West Thames Regional Genetics Service, London: Shirley Hodgson, Sheila Goff, Glen Brice, Lizzie Winchester, Charlotte Eddy, Vishakha Tripathi, Virginia Attard, Anna Lehmann. Wessex Clinical Genetics Service, Princess Anne Hospital, Southampton: Diana Eccles, Anneke Lucassen, Gillian Crawford, Donna McBride, Sarah Smalley; Ms. JoEllen Weaver and Dr. Betsy Bove for their technical support; Genetic Modifiers of Cancer Risk in BRCA1/2 Mutation Carriers (GEMO) study : National Cancer Genetics Network UNICANCER Genetic Group, France. GEMO Collaborating Centers are: Coordinating Centres, Unité Mixte de Génétique Constitutionnelle des Cancers Fréquents, Hospices Civils de Lyon - Centre Léon Bérard, & Equipe «Génétique du cancer du sein», Centre de Recherche en Cancérologie de Lyon: Olga Sinilnikova, Sylvie Mazoyer, Francesca Damiola, Laure Barjhoux, Carole Verny-Pierre, Alain Calender, Sophie Giraud, Mélanie Léone; and Service de Génétique Oncologique, Institut Curie, Paris: Dominique Stoppa-Lyonnet, Marion Gauthier-Villars, Bruno Buecher, Claude Houdayer, Virginie Moncoutier, Muriel Belotti, Carole Tirapo, Antoine de Pauw. Institut Gustave Roussy, Villejuif: Brigitte Bressac-de-Paillerets,

Olivier Caron. Centre Jean Perrin, Clermont–Ferrand: Yves-Jean Bignon, Nancy Uhrhammer. Centre Léon Bérard, Lyon: Christine Lasset, Valérie Bonadona, Sandrine Handallou. Centre François Baclesse, Caen: Agnès Hardouin, Pascaline Berthet. Institut Paoli Calmettes, Marseille: Hagay Sobol, Violaine Bourdon, Tetsuro Noguchi, Audrey Remenieras, François Eisinger. CHU Arnaud-de-Villeneuve, Montpellier: Isabelle Coupier, Pascal Pujol. Centre Oscar Lambret, Lille: Jean-Philippe Peyrat, Joëlle Fournier, Françoise Révillion, Philippe Vennin, Claude Adenis. Hôpital René Huguenin/Institut Curie, St Cloud: Etienne Rouleau, Rosette Lidereau, Liliane Demange, Catherine Nogues. Centre Paul Strauss, Strasbourg: Danièle Muller, Jean-Pierre Fricker. Institut Bergonié, Bordeaux: Emmanuelle Barouk-Simonet, Françoise Bonnet, Virginie Bubien, Nicolas Sevenet, Michel Longy. Institut Claudius Regaud, Toulouse: Christine Toulas, Rosine Guimbaud, Laurence Gladieff, Viviane Feillel. CHU Grenoble: Dominique Leroux, Hélène Dreyfus, Christine Rebuschung, Magalie Peysse. CHU Dijon: Fanny Coron, Laurence Faivre. CHU St-Etienne: Fabienne Prieur, Marine Lebrun, Caroline Kientz. Hôtel Dieu Centre Hospitalier, Chambéry: Sandra Fert Ferrer. Centre Antoine Lacassagne, Nice: Marc Fréany. CHU Limoges: Laurence Vénat-Bouvet. CHU Nantes: Capucine Delnatte. CHU Bretonneau, Tours: Isabelle Mortemousque. Groupe Hospitalier Pitié-Salpêtrière, Paris: Florence Coulet, Chrystelle Colas, Florent Soubrier. CHU Vandoeuvre-les-Nancy : Johanna Sokolowska, Myriam Bronner. CHU Besançon: Marie-Agnès Collonge-Rame, Alexandre Damette. Creighton University, Omaha, USA: Henry T.Lynch, Carrie L.Snyder; the technical support of Ilse Coene en Brecht Crombez; the investigators of the Australia New Zealand Gynaecological Oncology Group (ANZGOG)

We acknowledge Alicia Tosar for her technical assistance; Taru A. Muranen, Drs. Carl Blomqvist and Kirsimari Aaltonen and RNs Irja Erkkilä and Virpi Palola for their help with the HEBCS data and samples;

The Hereditary Breast and Ovarian Cancer Research Group Netherlands (HEBON) consists of the following Collaborating Centers: Coordinating center: Netherlands Cancer Institute, Amsterdam, NL: M.A. Rookus, F.B.L. Hogervorst, F.E. van Leeuwen, S. Verhoef, M.K. Schmidt, J.L. de Lange, R. Wijnands; Erasmus Medical Center, Rotterdam, NL: J.M. Collée, A.M.W. van den Ouweland, M.J. Hooning, C. Seynaeve, C.H.M. van Deurzen, I.M. Obdeijn; Leiden University Medical Center, NL: C.J. van Asperen, J.T. Wijnen, R.A.E.M. Tollenaar, P. Devilee, T.C.T.E.F. van Cronenburg; Radboud University Nijmegen Medical Center, NL: C.M. Kets, A.R. Mensenkamp; University Medical Center Utrecht, NL: M.G.E.M. Ausems, R.B. van der Luijt; Amsterdam Medical Center, NL: C.M. Aalfs, T.A.M. van Os; VU University Medical Center, Amsterdam, NL: J.J.P. Gille, Q. Waisfisz, H.E.J. Meijers-Heijboer; University Hospital Maastricht, NL: E.B. Gómez-García, M.J. Blok; University Medical Center Groningen, NL: J.C. Oosterwijk, A.H. van der Hout, M.J. Mourits, G.H. de Bock; The Netherlands Foundation for the detection of hereditary tumors, Leiden, NL: H.F. Vasen; The Netherlands Cancer Registry: S. Siesling; The Dutch Pathology Registry (PALGA): L.I.H. Overbeek; Hong Kong Sanatorium and Hospital for their continual support; Janos Papp, Tibor Vaszko, Aniko Bozsik, Timea Pocza, Judit Franko, Maria Balogh, Gabriella Domokos, Judit Ferenczi (Department of Molecular Genetics, National Institute of Oncology, Budapest, Hungary) and the clinicians and patients for their contributions to this study; the Oncogenetics Group, and the High Risk and Cancer Prevention Unit of the University Hospital Vall d'Hebron led by Dr. J. Balmaña; the ICO Hereditary Cancer Program team led by Dr. Gabriel Capella; Dr Martine Dumont, Martine Tranchant for sample

management and skillful technical assistance. J.S. and P.S. were part of the QC and Genotyping coordinating group of iCOGS (BCAC and CIMBA); Drs. Ana Peixoto, Catarina Santos, Patrícia Rocha and Pedro Pinto for their skillful contribution to the study; Heather Thorne, Eveline Niedermayr, all the kConFab research nurses and staff, the heads and staff of the Family Cancer Clinics, and the Clinical Follow Up Study (which has received funding from the NHMRC, the National Breast Cancer Foundation, Cancer Australia, and the National Institute of Health (USA)) for their contributions to this resource, and the many families who contribute to kConFab; Lenka Foretova and Eva Machackova (Department of Cancer Epidemiology and Genetics, Masaryk Memorial Cancer Institute and MF MU, Brno, Czech Republic); Michal Zikan, Petr Pohlreich and Zdenek Kleibl (Oncogynecologic Center and Department of Biochemistry and Experimental Oncology, First Faculty of Medicine, Charles University, Prague, Czech Republic); Anne Lincoln, Lauren Jacobs; the NICCC National Familial Cancer Consultation Service team led by Sara Dishon, the lab team led by Dr. Flavio Lejbkowitz, and the research field operations team led by Dr. Mila Pinchev; members and participants in the Ontario Cancer Genetics Network for their contributions to the study; Leigha Senter, Kevin Sweet, Caroline Craven, and Michelle O'Connor were instrumental in accrual of study participants, ascertainment of medical records and database management; the OSU Human Genetics Sample Bank; the Meirav Comprehensive breast cancer center team at the Sheba Medical Center; Åke Borg, Håkan Olsson, Helena Jernström, Karin Henriksson, Katja Harbst, Maria Soller, Ulf Kristoffersson; from Gothenburg Sahlgrenska University Hospital: Anna Öfverholm, Margareta Nordling, Per Karlsson, Zakaria Einbeigi; from Stockholm and Karolinska University Hospital: Anna von Wachenfeldt, Annelie Liljegren, Annika Lindblom, Brita Arver, Gisela Barbany Bustinza, Johanna Rantala; from Umeå University Hospital: Beatrice Melin, Christina Edwinsdotter Ardnor, Monica Emanuelsson; from Uppsala University: Hans Ehrencrona, Maritta Hellström Pigg, Richard Rosenquist; from Linköping University Hospital: Marie Stenmark-Askmal, Sigrun Liedgren; Cecilia Zvocec, Qun Niu, physicians, genetic counselors, research nurses and staff of the Cancer Risk Clinic for their contributions to this resource; Joyce Seldon MSGC and Lorna Kwan, MPH; Dr. Robert Nussbaum and the following genetic counselors: Beth Crawford, Kate Loranger, Julie Mak, Nicola Stewart, Robin Lee, Amie Blanco and Peggy Conrad; Ms. Salina Chan; Paul Pharoah, Simon Gayther, Susan Ramus, Carole Pye, Patricia Harrington and Eva Wozniak for their contributions towards the UKFOCR; Geoffrey Lindeman, Marion Harris, Martin Delatycki of the Victorian Familial Cancer Trials Group; Sarah Sawyer, Rebecca Driessen and Ella Thompson.

### **Personal support**

ACA is a Cancer Research-UK Senior Cancer Research Fellow (C12292/A11174). D.F.E. is a Principal Research Fellow of Cancer Research UK. G.C.-T., M.C.S. and I.C. are supported by the National Health and Medical Research Council. B.K. holds an American Cancer Society Early Detection Professorship (SIOP-06-258-01-COUN). L.E.K. is supported by a Canadian Institutes of Health Research Investigator award (MSH-87734). Alice Lee is supported by a T32 training grant from NIEHS. Drs. Greene, Mai and Savage were supported by funding

from the Intramural Research Program, NCI. OIO is an ACS Clinical Research Professor. J.S. is Chairholder of the Canada Research Chair in Oncogenetics.

Kate Lawrenson is funded by Ovarian Cancer Research Fund (OCRF) grant number 258807 and an Ann Schreiber Program of Excellence award from the Ovarian Cancer Research Fund (POE/USC/01.12). Janet Lee and Howard Shen are funded by National Institute of Health grant number 5 U19 CA148112-02. Tassja Spindler is funded by National Institute of Health grant number CA173531-01.

### **Funding of constituent studies**

#### OCAC

Funding of the constituent studies was provided by the American Cancer Society (CRTG-00-196-01-CCE); the California Cancer Research Program (00-01389V-20170, N01-CN25403, 2II0200); the Canadian Institutes for Health Research (MOP-86727); Cancer Council Victoria; Cancer Council Queensland; Cancer Council New South Wales; Cancer Council South Australia; Cancer Council Tasmania; Cancer Foundation of Western Australia; the Cancer Institute of New Jersey; Cancer Research UK (C490/A6187, C490/A10119, C490/A10124, C536/A13086, C536/A6689); the Celma Mastry Ovarian Cancer Foundation ; the Danish Cancer Society (94-222-52); the ELAN Program of the University of Erlangen-Nuremberg; the Eve Appeal; the Helsinki University Central Hospital Research Fund; Helse Vest; Imperial Experimental Cancer Research Centre (C1312/A15589); the Norwegian Cancer Society; the Norwegian Research Council; the Ovarian Cancer Research Fund; Nationaal Kankerplan of Belgium; Grant-in-Aid for the Third Term Comprehensive 10-Year Strategy for Cancer Control from the Ministry of Health Labour and Welfare of Japan; the L & S Milken Foundation; the Polish Ministry of Science and Higher Education (4 PO5C 028 14, 2 PO5A 068 27); Malaysian Ministry of Higher Education (UM.C/HIR/MOHE/06) and Cancer Research Initiatives Foundation; the Roswell Park Cancer Institute Alliance Foundation; the US National Cancer Institute (K07-CA80668, MO1- RR000056, P50-CA159981, K07-CA095666, K07-CA143047, K22-CA138563, N01-CN55424, N01-PC067010, N01-PC035137, P01-CA017054, P01-CA087696, P30-CA15083, P50-CA105009, P50-CA136393, R01-CA014089, R01-CA016056, R01-CA017054, R01-CA049449, R01-CA050385, R01-CA054419, R01-CA058598, R01-CA058860, R01-CA061107, R01-CA061132, R01-CA063682, R01-CA064277, R01-CA067262, R01-CA071766, R01-CA074850, R01-CA076016, R01-CA080742, R01-CA080978, R01-CA083918, R01-CA087538, R01-CA092044, R01-095023, R01-CA106414, R01-CA122443, R01-CA112523, R01-CA114343, R01-CA126841, R01-CA136924, R01-CA149429, R03-CA113148, R03-CA115195, R37-CA070867, R37-CA70867, U01-CA069417, U01-CA071966 and Intramural research funds); the US Army Medical Research and Material Command (DAMD17-98-1-8659, DAMD17-01-1-0729, DAMD17-02-1-0666, DAMD17-02-1-0669, W81XWH-10-1-0280); the National Health and Medical Research Council of Australia (199600 and 400281); the German Federal Ministry of Education and Research of Germany Programme of

Clinical Biomedical Research (01 GB 9401); the state of Baden-Württemberg through Medical Faculty of the University of Ulm (P.685); the Minnesota Ovarian Cancer Alliance; the Mayo Foundation; the Fred C. and Katherine B. Andersen Foundation; the Lon V. Smith Foundation (LVS-39420); the Oak Foundation; the OHSU Foundation; the Mermaid I project; the Rudolf-Bartling Foundation; the UK National Institute for Health Research Biomedical Research Centres at the University of Cambridge, Imperial College London, University College Hospital "Womens Health Theme" and the Royal Marsden Hospital; WorkSafeBC. Work was performed within the USC Norris Comprehensive Cancer Center which is supported by a Cancer Center Support Grant (award number P30 CA014089) from the National Cancer Institute.

### CIMBA

BCFR was supported by grant UM1 CA164920 from the National Cancer Institute. The content of this manuscript does not necessarily reflect the views or policies of the National Cancer Institute or any of the collaborating centers in the Breast Cancer Family Registry (BCFR), nor does mention of trade names, commercial products, or organizations imply endorsement by the US Government or the BCFR; BFBOCC is partly supported by: Lithuania (BFBOCC-LT): Research Council of Lithuania grant LIG-07/2012; BFBOCC-LV is partly supported by LSC grant 10.0010.08 and in part by a grant from the ESF Nr.2009/0220/1DP/1.1.1.2.0/09/APIA/VIAA/016 and Liepaja's municipal council; BIDMC is supported by the Breast Cancer Research Foundation; BRCA-gene mutations and breast cancer in South African women (BMBSA) was supported by grants from the Cancer Association of South Africa (CANSA) to Elizabeth J. van Rensburg; BRICOH SLN was partially supported by the Morris and Horowitz Families Endowed Professorship; CBCS was supported by the NEYE Foundation; CNIO was partially supported by Spanish Association against Cancer (AECC08), RTICC 06/0020/1060, FISPI08/1120, Mutua Madrileña Foundation (FMMA) and SAF2010-20493; City of Hope Clinical Cancer Genetics Community Network and the Hereditary Cancer Research Registry (COH-CCGCRN), supported in part by Award Number RC4CA153828 (PI: J. Weitzel) from the National Cancer Institute and the Office of the Director, National Institutes of Health. The content is solely the responsibility of the authors and does not necessarily represent the official views of the National Institutes of Health; CONSIT TEAM: Funds from Italian citizens who allocated the 5x1000 share of their tax payment in support of the Fondazione IRCCS Istituto Nazionale Tumori, according to Italian laws (INT-Institutional strategic projects '5x1000') to SM. Italian Association for Cancer Research (AIRC) to LO; DEMOKRITOS has been co-financed by the European Union (European Social Fund – ESF) and Greek national funds through the Operational Program "Education and Lifelong Learning" of the National Strategic Reference Framework (NSRF) - Research Funding Program of the General Secretariat for Research & Technology: ARISTEIA. Investing in knowledge society through the European Social Fund; DKFZ study was supported by the DKFZ; EMBRACE is supported by Cancer Research UK Grants C1287/A10118 and C1287/A11990. D. Gareth Evans and Fiona Lalloo are supported by an NIHR grant to the Biomedical Research Centre, Manchester. The Investigators at The Institute of Cancer Research and The Royal Marsden NHS Foundation Trust are supported by an NIHR grant to the Biomedical

Research Centre at The Institute of Cancer Research and The Royal Marsden NHS Foundation Trust. Ros Eeles and Elizabeth Bancroft are supported by Cancer Research UK Grant C5047/A8385; KUMC: The authors acknowledge support from The University of Kansas Cancer Center (P30 CA168524) and the Kansas Bioscience Authority Eminent Scholar Program. A.K.G. was funded by 5U01CA113916, R01CA140323, and by the Chancellors Distinguished Chair in Biomedical Sciences Professorship; The German Consortium of Hereditary Breast and Ovarian Cancer (GC-HBOC) is supported by the German Cancer Aid (grant no 109076, Rita K. Schmutzler) and by the Center for Molecular Medicine Cologne (CMMC)

GEMO was supported by the Ligue National Contre le Cancer; the Association "Le cancer du sein, parlons-en!" Award; and the Canadian Institutes of Health Research for the "CIHR Team in Familial Risks of Breast Cancer" program; G-FAST: Kim De Leeneer is supported by GOA grant BOF10/GOA/019 (Ghent University) and spearhead financing of Ghent University Hospital; GOG was supported by National Cancer Institute grants to the Gynecologic Oncology Group (GOG) Administrative Office and Tissue Bank (CA 27469), the GOG Statistical and Data Center (CA 37517), and GOG's Cancer Prevention and Control Committee (CA 101165); HCSC was supported by a grant RD12/00369/0006 and 12/00539 from ISCIII (Spain), partially supported by European Regional Development FEDER funds; HEBCS was financially supported by the Helsinki University Central Hospital Research Fund, Academy of Finland (266528), the Finnish Cancer Society and the Sigrid Juselius Foundation; HEBON is supported by the Dutch Cancer Society grants NKI1998-1854, NKI2004-3088, NKI2007-3756, the Netherlands Organization of Scientific Research grant NWO 91109024, the Pink Ribbon grant 110005 and the BBMRI grant NWO 184.021.007/CP46. HEBON thanks the registration teams of the Comprehensive Cancer Centre Netherlands and Comprehensive Centre South (together the Netherlands Cancer Registry) and PALGA (Dutch Pathology Registry) for part of the data collection; HRBCP is supported by The Hong Kong Hereditary Breast Cancer Family Registry and the Dr. Ellen Li Charitable Foundation, Hong Kong; HUNBOCS: Hungarian Breast and Ovarian Cancer Study was supported by Hungarian Research Grants KTIA-OTKA CK-80745 and OTKA K-112228; ICO: Contract grant sponsor: Asociación Española Contra el Cáncer; Spanish Health Research Foundation; Ramón Areces Foundation; Carlos III Health Institute; Catalan Health Institute; and Autonomous Government of Catalonia. Contract grant numbers: ISCIII RETIC RD06/0020/1051, PI09/02483, PI10/01422, PI10/00748, PI13/00285, PI13/00189 2009SGR290 and 2009SGR283; IHCC was supported by Grant PBZ\_KBN\_122/P05/2004; ILUH was supported by the Icelandic Association "Walking for Breast Cancer Research" and by the Landspítali University Hospital Research Fund; INHERIT was supported by the Canadian Institutes of Health Research for the "CIHR Team in Familial Risks of Breast Cancer" program, the Canadian Breast Cancer Research Alliance-grant #019511 and the Ministry of Economic Development, Innovation and Export Trade – grant # PSR-SIIRI-701; IOVHBOCS is supported by Ministero della Salute and "5x1000" Istituto Oncologico Veneto grant; IPOBCS was in part supported by Liga Portuguesa Contra o Cancro; kConFab is supported by a grant from the National Breast Cancer Foundation, and previously by the National Health and Medical Research Council (NHMRC), the Queensland Cancer Fund, the Cancer Councils of New South Wales, Victoria, Tasmania and South Australia, and the Cancer Foundation of Western Australia; MAYO is supported by NIH grants CA116167, CA128978 and CA176785, an NCI Specialized Program of Research Excellence



(SPORE) in Breast Cancer (CA116201), a U.S. Department of Defence Ovarian Cancer Idea award (W81XWH-10-1-0341), a grant from the Breast Cancer Research Foundation, a generous gift from the David F. and Margaret T. Grohne Family Foundation and the Ting Tsung and Wei Fong Chao Foundation; MCGILL : Jewish General Hospital Weekend to End Breast Cancer, Quebec Ministry of Economic Development, Innovation and Export Trade; MODSQUAD was supported by MH CZ - DRO (MMCI, 00209805) and by the European Regional Development Fund and the State Budget of the Czech Republic (RECAMO, CZ.1.05/2.1.00/03.0101) to LF, and by Charles University in Prague project UNCE204024 (MZ); MSKCC is supported by grants from the Breast Cancer Research Foundation and Robert and Kate Niehaus Clinical Cancer Genetics Initiative; NAROD: 1R01 CA149429-01; NCI: The research of Drs. MH Greene and PL Mai was supported by the Intramural Research Program of the US National Cancer Institute, NIH, and by support services contracts NO2-CP-11019-50 and NO2-CP-65504 with Westat, Inc, Rockville, MD; NICCC is supported by Clalit Health Services in Israel. Some of its activities are supported by the Israel Cancer Association and the Breast Cancer Research Foundation (BCRF), NY.; NNPIO has been supported by the Russian Federation for Basic Research (grants 11-04-00227, 12-04-00928 and 12-04-01490) and the Federal Agency for Science and Innovations, Russia (contract 02.740.11.0780); OSUCCG is supported by the Ohio State University Comprehensive Cancer Center; PBCS was supported by the ITT (Istituto Toscano Tumori) grants 2011-2013; SMC was partially funded through a grant by the Isreal cancer association and the funding for the Israeli Inherited breast cancer consortium; SWE-BRCA collaborators are supported by the Swedish Cancer Society; UCHICAGO is supported by NCI Specialized Program of Research Excellence (SPORE) in Breast Cancer (CA125183), R01 CA142996, 1U01CA161032 and by the Ralph and Marion Falk Medical Research Trust, the Entertainment Industry Fund National Women's Cancer Research Alliance and the Breast Cancer research Foundation; UCLA: Jonsson Comprehensive Cancer Center Foundation; Breast Cancer Research Foundation; UCSF Cancer Risk Program and Helen Diller Family Comprehensive Cancer Center; UKFOCR was supported by a project grant from CRUK to Paul Pharoah; UPENN: National Institutes of Health (NIH) (R01-CA102776 and R01-CA083855; Breast Cancer Research Foundation; Susan G. Komen Foundation for the cure, Bassler Research Center for BRCA; VFCTG: Victorian Cancer Agency, Cancer Australia, National Breast Cancer Foundation; The Women's Cancer Program (WCP) at the Samuel Oschin Comprehensive Cancer Institute is funded by the American Cancer Society Early Detection Professorship (SIOP-06-258-01-COUN).

## References

- 1 Barrett, J. C., Fry, B., Maller, J. & Daly, M. J. Haploview: analysis and visualization of LD and haplotype maps. *Bioinformatics* **21**, 263-265, doi:10.1093/bioinformatics/bth457 (2005).
- 2 Ramus, S. J. *et al.* Genetic variation at 9p22.2 and ovarian cancer risk for BRCA1 and BRCA2 mutation carriers. *J Natl Cancer Inst* **103**, 105-116, doi:10.1093/jnci/djq494 (2011).
- 3 Barnes, D. R. *et al.* Evaluation of association methods for analysing modifiers of disease risk in carriers of high-risk mutations. *Genet Epidemiol* **36**, 274-291, doi:10.1002/gepi.21620 (2012).
